# Supplementary material for: Insight into the mechanism of methane synthesis from syngas on a Ni(111) surface: a theoretical study
Source: Royal Society of Chemistry journal article supplement (doi:10.1039/c4ra17096b), 2015-01-01
Supplement: c4ra17096b1.pdf [file c4ra17096b1.pdf]

## Supporting Information

### Insight into the Mechanism of Methane Synthesis from Syngas

#### on Ni(111) Surface: A Theoretical Study

Cuimei Zhi<sup>a,b</sup> Qiang Wang<sup>c</sup> Baojun Wang<sup>a,\*</sup> Debao Li<sup>c</sup> Riguang Zhang<sup>a</sup>

<sup>a</sup> Key Laboratory of Coal Science and Technology of Ministry of Education and Shanxi Province, Taiyuan University of Technology, Taiyuan 030024, China<sup>□</sup>

<sup>b</sup> College of Chemistry and bioengineering, Taiyuan University of Science and Technology, Taiyuan 030021, China

<sup>c</sup> State Key Laboratory of Coal Conversion, Institute of Coal Chemistry, Chinese Academy of Sciences, Taiyuan 030001, Shanxi, PR China

**S1:** Cartesian coordinates and total energies of reactants

**S2:** Cartesian coordinates, total energies and imaginary frequencies for transition state structures

Table **S1:** Cartesian coordinates and total energies of all the optimized structures involved in methane synthesis from syngas on Ni(111) surface.

#### Species C

##### Fcc site

|    |             |             |             |
|----|-------------|-------------|-------------|
| Ni | 0.110900000 | 0.055319998 | 0.209910005 |
| Ni | 0.000170000 | 0.166250005 | 0.104939997 |
| Ni | 0.222220004 | 0.277779996 | 0.000000000 |
| Ni | 0.444220006 | 0.055369999 | 0.209920004 |
| Ni | 0.333570004 | 0.167280003 | 0.105240002 |
| Ni | 0.555559993 | 0.277779996 | 0.000000000 |
| Ni | 0.779940009 | 0.060090002 | 0.210099995 |
| Ni | 0.665939987 | 0.166240007 | 0.104939997 |
| Ni | 0.888890028 | 0.277779996 | 0.000000000 |

\* Corresponding author at: No. 79 Yingze West Street, Taiyuan 030024, China. Tel.: +86-351-6018239; Fax: +86-351-6041237. E-mail addresses: wangbaojun@tyut.edu.cn, quantumtyut@126.com (Baojun Wang)

|    |             |             |             |
|----|-------------|-------------|-------------|
| Ni | 0.106279999 | 0.386420012 | 0.210089996 |
| Ni | 0.000170000 | 0.500469983 | 0.104950003 |
| Ni | 0.222220004 | 0.611109972 | 0.000000000 |
| Ni | 0.440519989 | 0.381289989 | 0.216230005 |
| Ni | 0.334010005 | 0.500289977 | 0.105099998 |
| Ni | 0.555559993 | 0.611109972 | 0.000000000 |
| Ni | 0.779919982 | 0.386420012 | 0.210089996 |
| Ni | 0.666140020 | 0.500270009 | 0.105120003 |
| Ni | 0.888890028 | 0.611109972 | 0.000000000 |
| Ni | 0.110909998 | 0.722109973 | 0.209920004 |
| Ni | 0.999059975 | 0.832809985 | 0.105250001 |
| Ni | 0.222220004 | 0.944440007 | 0.000000000 |
| Ni | 0.440539986 | 0.725820005 | 0.216179997 |
| Ni | 0.333559990 | 0.832880020 | 0.105240002 |
| Ni | 0.555559993 | 0.944440007 | 0.000000000 |
| Ni | 0.785049975 | 0.725799978 | 0.216199994 |
| Ni | 0.666149974 | 0.832449973 | 0.105109997 |
| Ni | 0.888890028 | 0.944440007 | 0.000000000 |
| C  | 0.555239975 | 0.610899985 | 0.265940011 |

Total energy (eV): -139.635170

#### Hcp site

|    |             |             |             |
|----|-------------|-------------|-------------|
| Ni | 0.111109845 | 0.055488575 | 0.209972784 |
| Ni | 0.000187735 | 0.166453809 | 0.105002113 |
| Ni | 0.222220004 | 0.277779996 | 0.000000000 |
| Ni | 0.444423705 | 0.055480730 | 0.209973812 |
| Ni | 0.333685964 | 0.167343900 | 0.105231695 |
| Ni | 0.555559993 | 0.277779996 | 0.000000000 |
| Ni | 0.780159712 | 0.060278855 | 0.210169777 |
| Ni | 0.666298211 | 0.166451722 | 0.105001330 |
| Ni | 0.888890028 | 0.277779996 | 0.000000000 |
| Ni | 0.106379509 | 0.386484236 | 0.210167974 |
| Ni | 0.000184595 | 0.500327885 | 0.105003864 |
| Ni | 0.222220004 | 0.611109972 | 0.000000000 |
| Ni | 0.440734118 | 0.381450444 | 0.216088787 |
| Ni | 0.334114790 | 0.500349820 | 0.105167016 |
| Ni | 0.555559993 | 0.611109972 | 0.000000000 |
| Ni | 0.780142069 | 0.386488318 | 0.210167199 |
| Ni | 0.666279018 | 0.500355482 | 0.105172716 |
| Ni | 0.888890028 | 0.611109972 | 0.000000000 |
| Ni | 0.111129835 | 0.722195148 | 0.209972277 |
| Ni | 0.999278128 | 0.832930863 | 0.105230592 |
| Ni | 0.222220004 | 0.944440007 | 0.000000000 |
| Ni | 0.440772623 | 0.725869477 | 0.216070578 |

|                                |             |             |             |
|--------------------------------|-------------|-------------|-------------|
| Ni                             | 0.333682239 | 0.832933247 | 0.105228290 |
| Ni                             | 0.555559993 | 0.944440007 | 0.000000000 |
| Ni                             | 0.785175741 | 0.725895941 | 0.216079950 |
| Ni                             | 0.666281223 | 0.832525134 | 0.105171323 |
| Ni                             | 0.888890028 | 0.944440007 | 0.000000000 |
| C                              | 0.555545270 | 0.611012518 | 0.265749514 |
| Total energy (eV): -139.635266 |             |             |             |

## Species H

### Fcc site

|                                |             |             |             |
|--------------------------------|-------------|-------------|-------------|
| Ni                             | 0.111100003 | 0.055470001 | 0.210519999 |
| Ni                             | 0.000170000 | 0.166490003 | 0.105130002 |
| Ni                             | 0.222220004 | 0.277779996 | 0.000000000 |
| Ni                             | 0.444420010 | 0.055459999 | 0.210510001 |
| Ni                             | 0.333429992 | 0.166840002 | 0.105630003 |
| Ni                             | 0.555559993 | 0.277779996 | 0.000000000 |
| Ni                             | 0.778649986 | 0.057250001 | 0.210339993 |
| Ni                             | 0.666339993 | 0.166490003 | 0.105130002 |
| Ni                             | 0.888890028 | 0.277779996 | 0.000000000 |
| Ni                             | 0.109379999 | 0.387989998 | 0.210339993 |
| Ni                             | 0.000180000 | 0.500320017 | 0.105130002 |
| Ni                             | 0.222220004 | 0.611109972 | 0.000000000 |
| Ni                             | 0.443659991 | 0.387290001 | 0.212099999 |
| Ni                             | 0.333389997 | 0.500010014 | 0.105300002 |
| Ni                             | 0.555559993 | 0.611109972 | 0.000000000 |
| Ni                             | 0.778659999 | 0.387980014 | 0.210329995 |
| Ni                             | 0.666639984 | 0.500010014 | 0.105300002 |
| Ni                             | 0.888890028 | 0.611109972 | 0.000000000 |
| Ni                             | 0.111139998 | 0.722220004 | 0.210519999 |
| Ni                             | 0.999729991 | 0.833180010 | 0.105640002 |
| Ni                             | 0.222220004 | 0.944440007 | 0.000000000 |
| Ni                             | 0.443699986 | 0.722909987 | 0.212129995 |
| Ni                             | 0.333469987 | 0.833169997 | 0.105640002 |
| Ni                             | 0.555559993 | 0.944440007 | 0.000000000 |
| Ni                             | 0.779259980 | 0.722920001 | 0.212129995 |
| Ni                             | 0.666649997 | 0.833270013 | 0.105300002 |
| Ni                             | 0.888890028 | 0.944440007 | 0.000000000 |
| H                              | 0.555499971 | 0.610920012 | 0.259440005 |
| Total energy (eV): -135.456546 |             |             |             |

### Hcp site

|    |             |             |             |
|----|-------------|-------------|-------------|
| Ni | 0.110119976 | 0.053567674 | 0.210307896 |
| Ni | 0.000082085 | 0.167197362 | 0.105454102 |

|    |             |             |             |
|----|-------------|-------------|-------------|
| Ni | 0.222220004 | 0.277779996 | 0.000000000 |
| Ni | 0.445096850 | 0.055846021 | 0.210341886 |
| Ni | 0.333815634 | 0.167231187 | 0.105470940 |
| Ni | 0.555559993 | 0.277779996 | 0.000000000 |
| Ni | 0.777393401 | 0.055809550 | 0.210316688 |
| Ni | 0.666664839 | 0.166653231 | 0.104981244 |
| Ni | 0.888890028 | 0.277779996 | 0.000000000 |
| Ni | 0.110427506 | 0.388516426 | 0.212487504 |
| Ni | 0.000075953 | 0.499518394 | 0.105459273 |
| Ni | 0.222220004 | 0.611109972 | 0.000000000 |
| Ni | 0.444661677 | 0.388583273 | 0.212525785 |
| Ni | 0.333313525 | 0.499980330 | 0.105167866 |
| Ni | 0.555559993 | 0.611109972 | 0.000000000 |
| Ni | 0.777402878 | 0.388195932 | 0.210328445 |
| Ni | 0.666073143 | 0.499511033 | 0.105472565 |
| Ni | 0.888890028 | 0.611109972 | 0.000000000 |
| Ni | 0.110121638 | 0.723156571 | 0.210311607 |
| Ni | 0.999989867 | 0.833310783 | 0.105049998 |
| Ni | 0.222220004 | 0.944440007 | 0.000000000 |
| Ni | 0.444644094 | 0.722648263 | 0.212531820 |
| Ni | 0.333812445 | 0.833220243 | 0.105477221 |
| Ni | 0.555559993 | 0.944440007 | 0.000000000 |
| Ni | 0.779700696 | 0.723150790 | 0.210326746 |
| Ni | 0.666072011 | 0.833195150 | 0.105479099 |
| Ni | 0.888890028 | 0.944440007 | 0.000000000 |
| H  | 0.332924247 | 0.499702305 | 0.260175824 |

Total energy (eV): -135.446284

### Species O

|    |             |             |             |
|----|-------------|-------------|-------------|
| Ni | 0.111479998 | 0.055369999 | 0.210020006 |
| Ni | 0.000450000 | 0.166219994 | 0.104690000 |
| Ni | 0.222220004 | 0.277779996 | 0.000000000 |
| Ni | 0.443949997 | 0.055330001 | 0.210020006 |
| Ni | 0.333929986 | 0.167830005 | 0.105949998 |
| Ni | 0.555559993 | 0.277779996 | 0.000000000 |
| Ni | 0.780539989 | 0.061009999 | 0.209519997 |
| Ni | 0.665790021 | 0.166209996 | 0.104690000 |
| Ni | 0.888890028 | 0.277779996 | 0.000000000 |
| Ni | 0.105719998 | 0.386180013 | 0.209509999 |
| Ni | 0.000440000 | 0.500869989 | 0.104690000 |
| Ni | 0.222220004 | 0.611109972 | 0.000000000 |
| Ni | 0.441269994 | 0.382420003 | 0.215409994 |
| Ni | 0.334719986 | 0.500689983 | 0.105209999 |
| Ni | 0.555559993 | 0.611109972 | 0.000000000 |

|                                |             |             |             |
|--------------------------------|-------------|-------------|-------------|
| Ni                             | 0.780499995 | 0.386200011 | 0.209509999 |
| Ni                             | 0.665979981 | 0.500689983 | 0.105200000 |
| Ni                             | 0.888890028 | 0.611109972 | 0.000000000 |
| Ni                             | 0.111450002 | 0.722750008 | 0.210010007 |
| Ni                             | 0.998950005 | 0.832809985 | 0.105939999 |
| Ni                             | 0.222220004 | 0.944440007 | 0.000000000 |
| Ni                             | 0.441269994 | 0.725570023 | 0.215379998 |
| Ni                             | 0.333920002 | 0.832780004 | 0.105939999 |
| Ni                             | 0.555559993 | 0.944440007 | 0.000000000 |
| Ni                             | 0.784460008 | 0.725579977 | 0.215360001 |
| Ni                             | 0.665989995 | 0.831960022 | 0.105190001 |
| Ni                             | 0.888890028 | 0.944440007 | 0.000000000 |
| O                              | 0.555800021 | 0.611320019 | 0.271620005 |
| Total energy (eV): -138.857673 |             |             |             |

## Species CO

### Fcc site

|    |             |             |             |
|----|-------------|-------------|-------------|
| Ni | 0.111144125 | 0.055496436 | 0.210193470 |
| Ni | 0.000226549 | 0.166440219 | 0.105053425 |
| Ni | 0.222220004 | 0.277779996 | 0.000000000 |
| Ni | 0.444334656 | 0.055702996 | 0.210197076 |
| Ni | 0.333903223 | 0.167804658 | 0.105654448 |
| Ni | 0.555559993 | 0.277779996 | 0.000000000 |
| Ni | 0.779192924 | 0.058394045 | 0.210004807 |
| Ni | 0.666220009 | 0.166436076 | 0.105052605 |
| Ni | 0.888890028 | 0.277779996 | 0.000000000 |
| Ni | 0.108214937 | 0.387430549 | 0.210017622 |
| Ni | 0.000231674 | 0.500448287 | 0.105060957 |
| Ni | 0.222220004 | 0.611109972 | 0.000000000 |
| Ni | 0.444785446 | 0.389856189 | 0.214808419 |
| Ni | 0.333990604 | 0.500282109 | 0.105121687 |
| Ni | 0.555559993 | 0.611109972 | 0.000000000 |
| Ni | 0.779102743 | 0.387524754 | 0.210029751 |
| Ni | 0.666287184 | 0.500321388 | 0.105194688 |
| Ni | 0.888890028 | 0.611109972 | 0.000000000 |
| Ni | 0.110959478 | 0.722348452 | 0.210186064 |
| Ni | 0.998950958 | 0.832817972 | 0.105603196 |
| Ni | 0.222220004 | 0.944440007 | 0.000000000 |
| Ni | 0.444409639 | 0.722171605 | 0.214357555 |
| Ni | 0.333796352 | 0.832890272 | 0.105555885 |
| Ni | 0.555559993 | 0.944440007 | 0.000000000 |
| Ni | 0.776770711 | 0.721819580 | 0.214655355 |
| Ni | 0.666353047 | 0.832664967 | 0.105116986 |

|                                |             |             |             |
|--------------------------------|-------------|-------------|-------------|
| Ni                             | 0.888890028 | 0.944440007 | 0.000000000 |
| C                              | 0.553834915 | 0.612231493 | 0.284118056 |
| O                              | 0.554149568 | 0.613529742 | 0.346696109 |
| Total energy (eV): -148.284306 |             |             |             |

### Hcp site

|                                |             |             |             |
|--------------------------------|-------------|-------------|-------------|
| Ni                             | 0.109590001 | 0.052450001 | 0.210030004 |
| Ni                             | 0.000810000 | 0.168050006 | 0.105570003 |
| Ni                             | 0.222220004 | 0.277779996 | 0.000000000 |
| Ni                             | 0.445230007 | 0.055830002 | 0.210229993 |
| Ni                             | 0.333880007 | 0.167980000 | 0.105520003 |
| Ni                             | 0.555559993 | 0.277779996 | 0.000000000 |
| Ni                             | 0.777409971 | 0.055920001 | 0.210240006 |
| Ni                             | 0.666670024 | 0.166659996 | 0.104960002 |
| Ni                             | 0.888890028 | 0.277779996 | 0.000000000 |
| Ni                             | 0.111170001 | 0.388810009 | 0.214540005 |
| Ni                             | 0.000800000 | 0.499379992 | 0.105559997 |
| Ni                             | 0.222220004 | 0.611109972 | 0.000000000 |
| Ni                             | 0.444620013 | 0.388689995 | 0.214379996 |
| Ni                             | 0.333319992 | 0.500000000 | 0.104860000 |
| Ni                             | 0.555559993 | 0.611109972 | 0.000000000 |
| Ni                             | 0.777490020 | 0.388069987 | 0.210260004 |
| Ni                             | 0.665369987 | 0.499430001 | 0.105530001 |
| Ni                             | 0.888890028 | 0.611109972 | 0.000000000 |
| Ni                             | 0.109619997 | 0.723699987 | 0.210020006 |
| Ni                             | 0.000000000 | 0.833320022 | 0.104860000 |
| Ni                             | 0.222220004 | 0.944440007 | 0.000000000 |
| Ni                             | 0.444480002 | 0.722090006 | 0.214410007 |
| Ni                             | 0.333900005 | 0.832579970 | 0.105520003 |
| Ni                             | 0.555559993 | 0.944440007 | 0.000000000 |
| Ni                             | 0.780849993 | 0.723710001 | 0.210020006 |
| Ni                             | 0.665359974 | 0.832589984 | 0.105540000 |
| Ni                             | 0.888890028 | 0.944440007 | 0.000000000 |
| C                              | 0.333750010 | 0.499489993 | 0.283670008 |
| O                              | 0.334470004 | 0.500069976 | 0.346260011 |
| Total energy (eV): -148.294480 |             |             |             |

### Species OH

|    |             |             |             |
|----|-------------|-------------|-------------|
| Ni | 0.111259997 | 0.055640001 | 0.210109994 |
| Ni | 0.000620000 | 0.166329995 | 0.104510002 |
| Ni | 0.222220004 | 0.277779996 | 0.000000000 |
| Ni | 0.444759995 | 0.055610001 | 0.210120007 |
| Ni | 0.334619999 | 0.169009998 | 0.106320001 |
| Ni | 0.555559993 | 0.277779996 | 0.000000000 |

|    |             |             |             |
|----|-------------|-------------|-------------|
| Ni | 0.780430019 | 0.060460001 | 0.209140003 |
| Ni | 0.665899992 | 0.166280001 | 0.104510002 |
| Ni | 0.888890028 | 0.277779996 | 0.000000000 |
| Ni | 0.106569998 | 0.386590004 | 0.209160000 |
| Ni | 0.000630000 | 0.500980020 | 0.104500003 |
| Ni | 0.222220004 | 0.611109972 | 0.000000000 |
| Ni | 0.440019995 | 0.379579991 | 0.213890001 |
| Ni | 0.334919989 | 0.500779986 | 0.105410002 |
| Ni | 0.555559993 | 0.611109972 | 0.000000000 |
| Ni | 0.780439973 | 0.386599988 | 0.209089994 |
| Ni | 0.666100025 | 0.500729978 | 0.105319999 |
| Ni | 0.888890028 | 0.611109972 | 0.000000000 |
| Ni | 0.111340001 | 0.722220004 | 0.210120007 |
| Ni | 0.997860014 | 0.832260013 | 0.106299996 |
| Ni | 0.222220004 | 0.944440007 | 0.000000000 |
| Ni | 0.440129995 | 0.726890028 | 0.213990003 |
| Ni | 0.334679991 | 0.832189977 | 0.106349997 |
| Ni | 0.555559993 | 0.944440007 | 0.000000000 |
| Ni | 0.787209988 | 0.726859987 | 0.213819996 |
| Ni | 0.666140020 | 0.832059979 | 0.105370000 |
| Ni | 0.888890028 | 0.944440007 | 0.000000000 |
| O  | 0.556180000 | 0.610960007 | 0.281010002 |
| H  | 0.557609975 | 0.610989988 | 0.332010001 |

Total energy (eV): -142.623358

### Species H<sub>2</sub>O

|    |             |             |             |
|----|-------------|-------------|-------------|
| Ni | 0.107019998 | 0.052499998 | 0.210150003 |
| Ni | 0.998799980 | 0.165979996 | 0.105080001 |
| Ni | 0.222220004 | 0.277779996 | 0.000000000 |
| Ni | 0.443219990 | 0.052519999 | 0.209879994 |
| Ni | 0.333169997 | 0.168430001 | 0.106579997 |
| Ni | 0.555559993 | 0.277779996 | 0.000000000 |
| Ni | 0.775650024 | 0.054340001 | 0.210639998 |
| Ni | 0.665300012 | 0.165959999 | 0.104910001 |
| Ni | 0.888890028 | 0.277779996 | 0.000000000 |
| Ni | 0.107050002 | 0.387580007 | 0.210130006 |
| Ni | 0.998989999 | 0.499540001 | 0.104730003 |
| Ni | 0.222220004 | 0.611109972 | 0.000000000 |
| Ni | 0.442279994 | 0.387580007 | 0.217030004 |
| Ni | 0.333139986 | 0.497900009 | 0.106530003 |
| Ni | 0.555559993 | 0.611109972 | 0.000000000 |
| Ni | 0.777970016 | 0.387349993 | 0.209670007 |
| Ni | 0.663110018 | 0.498100013 | 0.106210001 |
| Ni | 0.888890028 | 0.611109972 | 0.000000000 |

|                                |             |             |             |
|--------------------------------|-------------|-------------|-------------|
| Ni                             | 0.109389998 | 0.721140027 | 0.210270002 |
| Ni                             | 0.998969972 | 0.832570016 | 0.104750000 |
| Ni                             | 0.222220004 | 0.944440007 | 0.000000000 |
| Ni                             | 0.443170011 | 0.723710001 | 0.209830001 |
| Ni                             | 0.331609994 | 0.832390010 | 0.104640000 |
| Ni                             | 0.555559993 | 0.944440007 | 0.000000000 |
| Ni                             | 0.777869999 | 0.723439991 | 0.209710002 |
| Ni                             | 0.665329993 | 0.832440019 | 0.104929999 |
| Ni                             | 0.888890028 | 0.944440007 | 0.000000000 |
| O                              | 0.461080015 | 0.398160011 | 0.331030011 |
| H                              | 0.539489985 | 0.546720028 | 0.340750009 |
| H                              | 0.556819975 | 0.347499996 | 0.340759993 |
| Total energy (eV): -146.150949 |             |             |             |

## Species CH

### Fcc site

|    |             |             |             |
|----|-------------|-------------|-------------|
| Ni | 0.111040205 | 0.055223759 | 0.210328951 |
| Ni | 0.000124340 | 0.166519359 | 0.105243690 |
| Ni | 0.222220004 | 0.277779996 | 0.000000000 |
| Ni | 0.443987727 | 0.055483431 | 0.210296854 |
| Ni | 0.333176076 | 0.166476890 | 0.105324395 |
| Ni | 0.555559993 | 0.277779996 | 0.000000000 |
| Ni | 0.779502451 | 0.059115887 | 0.210569590 |
| Ni | 0.666360140 | 0.166510567 | 0.105250120 |
| Ni | 0.888890028 | 0.277779996 | 0.000000000 |
| Ni | 0.107424118 | 0.387056738 | 0.210567445 |
| Ni | 0.000132770 | 0.500280082 | 0.105245307 |
| Ni | 0.222220004 | 0.611109972 | 0.000000000 |
| Ni | 0.443356484 | 0.387187958 | 0.215741366 |
| Ni | 0.334154397 | 0.500405908 | 0.105304442 |
| Ni | 0.555559993 | 0.611109972 | 0.000000000 |
| Ni | 0.779477835 | 0.387106299 | 0.210566774 |
| Ni | 0.666200399 | 0.500445664 | 0.105408207 |
| Ni | 0.888890028 | 0.611109972 | 0.000000000 |
| Ni | 0.110914916 | 0.722547770 | 0.210311323 |
| Ni | 0.999961913 | 0.833337545 | 0.105368473 |
| Ni | 0.222220004 | 0.944440007 | 0.000000000 |
| Ni | 0.443128914 | 0.723284781 | 0.215484366 |
| Ni | 0.333096057 | 0.833494961 | 0.105275981 |
| Ni | 0.555559993 | 0.944440007 | 0.000000000 |
| Ni | 0.778687358 | 0.722779334 | 0.215953380 |
| Ni | 0.666221678 | 0.832457423 | 0.105359934 |
| Ni | 0.888890028 | 0.944440007 | 0.000000000 |



|   |             |             |             |
|---|-------------|-------------|-------------|
| H | 0.552223742 | 0.611146092 | 0.333072186 |
| C | 0.554027498 | 0.611088693 | 0.275247246 |

Total energy (eV): -144.089805

### Hcp site

|    |             |             |             |
|----|-------------|-------------|-------------|
| Ni | 0.109250002 | 0.052700002 | 0.210329995 |
| Ni | 0.000180000 | 0.167469993 | 0.105480000 |
| Ni | 0.222220004 | 0.277779996 | 0.000000000 |
| Ni | 0.444750011 | 0.056490000 | 0.210690007 |
| Ni | 0.333490014 | 0.167659998 | 0.105499998 |
| Ni | 0.555559993 | 0.277779996 | 0.000000000 |
| Ni | 0.777310014 | 0.056170002 | 0.210710004 |
| Ni | 0.666559994 | 0.166800007 | 0.105200000 |
| Ni | 0.888890028 | 0.277779996 | 0.000000000 |
| Ni | 0.107019998 | 0.387519985 | 0.214340001 |
| Ni | 0.000080000 | 0.499940008 | 0.105480000 |
| Ni | 0.222220004 | 0.611109972 | 0.000000000 |
| Ni | 0.445569992 | 0.387870014 | 0.214540005 |
| Ni | 0.333169997 | 0.500199974 | 0.103529997 |
| Ni | 0.555559993 | 0.611109972 | 0.000000000 |
| Ni | 0.776950002 | 0.388630003 | 0.210710004 |
| Ni | 0.665719986 | 0.499879986 | 0.105509996 |
| Ni | 0.888890028 | 0.611109972 | 0.000000000 |
| Ni | 0.109159999 | 0.724229991 | 0.210350007 |
| Ni | 0.999830008 | 0.833519995 | 0.105109997 |
| Ni | 0.222220004 | 0.944440007 | 0.000000000 |
| Ni | 0.445899993 | 0.726369977 | 0.214340001 |
| Ni | 0.333409995 | 0.833310008 | 0.105460003 |
| Ni | 0.555559993 | 0.944440007 | 0.000000000 |
| Ni | 0.780719995 | 0.724150002 | 0.210350007 |
| Ni | 0.665929973 | 0.833199978 | 0.105480000 |
| Ni | 0.888890028 | 0.944440007 | 0.000000000 |
| H  | 0.331970006 | 0.501619995 | 0.330790013 |
| C  | 0.332639992 | 0.501070023 | 0.272949994 |

Total energy (eV): -144.066491

### Species CH<sub>2</sub>

|    |             |             |             |
|----|-------------|-------------|-------------|
| Ni | 0.108570002 | 0.056000002 | 0.210179999 |
| Ni | 0.998629987 | 0.166280001 | 0.104759999 |
| Ni | 0.222220004 | 0.277779996 | 0.000000000 |
| Ni | 0.441219985 | 0.058529999 | 0.210260004 |
| Ni | 0.331719995 | 0.166419998 | 0.105269998 |
| Ni | 0.555559993 | 0.277779996 | 0.000000000 |
| Ni | 0.777880013 | 0.060619999 | 0.209869996 |

|    |             |             |             |
|----|-------------|-------------|-------------|
| Ni | 0.664399981 | 0.166270003 | 0.104920000 |
| Ni | 0.888890028 | 0.277779996 | 0.000000000 |
| Ni | 0.103979997 | 0.386700004 | 0.210020006 |
| Ni | 0.998529971 | 0.500280023 | 0.104939997 |
| Ni | 0.222220004 | 0.611109972 | 0.000000000 |
| Ni | 0.440200001 | 0.389739990 | 0.214729995 |
| Ni | 0.333039999 | 0.500079989 | 0.105329998 |
| Ni | 0.555559993 | 0.611109972 | 0.000000000 |
| Ni | 0.776920021 | 0.387569994 | 0.209729999 |
| Ni | 0.664569974 | 0.500460029 | 0.105219997 |
| Ni | 0.888890028 | 0.611109972 | 0.000000000 |
| Ni | 0.105999999 | 0.723070025 | 0.210219994 |
| Ni | 0.998799980 | 0.833310008 | 0.105219997 |
| Ni | 0.222220004 | 0.944440007 | 0.000000000 |
| Ni | 0.438930005 | 0.725430012 | 0.214919999 |
| Ni | 0.332650006 | 0.832090020 | 0.106600001 |
| Ni | 0.555559993 | 0.944440007 | 0.000000000 |
| Ni | 0.775680006 | 0.724500000 | 0.214440003 |
| Ni | 0.665000021 | 0.832019985 | 0.105209999 |
| Ni | 0.888890028 | 0.944440007 | 0.000000000 |
| H  | 0.477789998 | 0.698170006 | 0.303680003 |
| H  | 0.601530015 | 0.560530007 | 0.329730004 |
| C  | 0.557160020 | 0.609799981 | 0.281399995 |

Total energy (eV): -147.685028

### Species CH<sub>3</sub>

|    |             |             |             |
|----|-------------|-------------|-------------|
| Ni | 0.106710002 | 0.053479999 | 0.209020004 |
| Ni | 0.000020000 | 0.167559996 | 0.104500003 |
| Ni | 0.222220004 | 0.277779996 | 0.000000000 |
| Ni | 0.443870008 | 0.054180000 | 0.213170007 |
| Ni | 0.334080011 | 0.167180002 | 0.105310000 |
| Ni | 0.555559993 | 0.277779996 | 0.000000000 |
| Ni | 0.779609978 | 0.053360000 | 0.209059998 |
| Ni | 0.665830016 | 0.167190000 | 0.105099998 |
| Ni | 0.888890028 | 0.277779996 | 0.000000000 |
| Ni | 0.111089997 | 0.388850003 | 0.210030004 |
| Ni | 0.998669982 | 0.499509990 | 0.105899997 |
| Ni | 0.222220004 | 0.611109972 | 0.000000000 |
| Ni | 0.444180012 | 0.389679998 | 0.213450000 |
| Ni | 0.333909988 | 0.499100000 | 0.106090002 |
| Ni | 0.555559993 | 0.611109972 | 0.000000000 |
| Ni | 0.778959990 | 0.389140010 | 0.212970003 |
| Ni | 0.665960014 | 0.498890013 | 0.105209999 |

|                                |             |             |             |
|--------------------------------|-------------|-------------|-------------|
| Ni                             | 0.888890028 | 0.611109972 | 0.000000000 |
| Ni                             | 0.110969998 | 0.722239971 | 0.209999993 |
| Ni                             | 0.000090000 | 0.832819998 | 0.104510002 |
| Ni                             | 0.222220004 | 0.944440007 | 0.000000000 |
| Ni                             | 0.444299996 | 0.722060025 | 0.210079998 |
| Ni                             | 0.333719999 | 0.834720016 | 0.105999999 |
| Ni                             | 0.555559993 | 0.944440007 | 0.000000000 |
| Ni                             | 0.779649973 | 0.726320028 | 0.209040001 |
| Ni                             | 0.665359974 | 0.832859993 | 0.104489997 |
| Ni                             | 0.888890028 | 0.944440007 | 0.000000000 |
| H                              | 0.473610014 | 0.117399998 | 0.316320002 |
| H                              | 0.715879977 | 0.353859991 | 0.316630006 |
| H                              | 0.479299992 | 0.359530002 | 0.316469997 |
| C                              | 0.556559980 | 0.277190000 | 0.293599993 |
| Total energy (eV): -151.678907 |             |             |             |

### Species CH<sub>4</sub>

|    |             |             |             |
|----|-------------|-------------|-------------|
| Ni | 0.110760003 | 0.055220000 | 0.210339993 |
| Ni | 0.000050000 | 0.166679993 | 0.105180003 |
| Ni | 0.222220004 | 0.277779996 | 0.000000000 |
| Ni | 0.444519997 | 0.055280000 | 0.210339993 |
| Ni | 0.333389997 | 0.166759998 | 0.105219997 |
| Ni | 0.555559993 | 0.277779996 | 0.000000000 |
| Ni | 0.777769983 | 0.055550002 | 0.210480005 |
| Ni | 0.666649997 | 0.166690007 | 0.105190001 |
| Ni | 0.888890028 | 0.277779996 | 0.000000000 |
| Ni | 0.110760003 | 0.388830006 | 0.210339993 |
| Ni | 0.000040000 | 0.500050008 | 0.105159998 |
| Ni | 0.222220004 | 0.611109972 | 0.000000000 |
| Ni | 0.444420010 | 0.388889998 | 0.210630000 |
| Ni | 0.333380014 | 0.499969989 | 0.105209999 |
| Ni | 0.555559993 | 0.611109972 | 0.000000000 |
| Ni | 0.778060019 | 0.388839990 | 0.210360005 |
| Ni | 0.666580021 | 0.499949992 | 0.105219997 |
| Ni | 0.888890028 | 0.611109972 | 0.000000000 |
| Ni | 0.111110002 | 0.722209990 | 0.210470006 |
| Ni | 0.000030000 | 0.833310008 | 0.105149999 |
| Ni | 0.222220004 | 0.944440007 | 0.000000000 |
| Ni | 0.444530010 | 0.722609997 | 0.210339993 |
| Ni | 0.333279997 | 0.833289981 | 0.105159998 |
| Ni | 0.555559993 | 0.944440007 | 0.000000000 |
| Ni | 0.778079987 | 0.722530007 | 0.210350007 |
| Ni | 0.666649997 | 0.833280027 | 0.105190001 |
| Ni | 0.888890028 | 0.944440007 | 0.000000000 |

|                                |             |             |             |
|--------------------------------|-------------|-------------|-------------|
| H                              | 0.384270012 | 0.222550005 | 0.406529993 |
| H                              | 0.384130001 | 0.392670006 | 0.340259999 |
| H                              | 0.384140015 | 0.455089986 | 0.430949986 |
| H                              | 0.610989988 | 0.470079988 | 0.392500013 |
| C                              | 0.441379994 | 0.385010004 | 0.392969996 |
| Total energy (eV): -155.637775 |             |             |             |

## Species HCO

### Fcc site

|                                |             |             |             |
|--------------------------------|-------------|-------------|-------------|
| Ni                             | 0.117185779 | 0.060642853 | 0.209794328 |
| Ni                             | 0.000417294 | 0.165802076 | 0.104567982 |
| Ni                             | 0.222220004 | 0.277779996 | 0.000000000 |
| Ni                             | 0.446146846 | 0.056858417 | 0.209923044 |
| Ni                             | 0.335131228 | 0.168329507 | 0.105117172 |
| Ni                             | 0.555559993 | 0.277779996 | 0.000000000 |
| Ni                             | 0.779079974 | 0.059170000 | 0.209110007 |
| Ni                             | 0.666639984 | 0.166800007 | 0.104699999 |
| Ni                             | 0.888890028 | 0.277779996 | 0.000000000 |
| Ni                             | 0.106749997 | 0.386940002 | 0.208989993 |
| Ni                             | 0.000420000 | 0.501450002 | 0.104570001 |
| Ni                             | 0.222220004 | 0.611109972 | 0.000000000 |
| Ni                             | 0.442710012 | 0.393339992 | 0.215090007 |
| Ni                             | 0.335240006 | 0.501039982 | 0.104649998 |
| Ni                             | 0.555559993 | 0.611109972 | 0.000000000 |
| Ni                             | 0.779070020 | 0.387160003 | 0.209189996 |
| Ni                             | 0.666679978 | 0.501900017 | 0.105530001 |
| Ni                             | 0.888890028 | 0.611109972 | 0.000000000 |
| Ni                             | 0.116930000 | 0.723710001 | 0.209769994 |
| Ni                             | 0.998650014 | 0.832809985 | 0.106440000 |
| Ni                             | 0.222220004 | 0.944440007 | 0.000000000 |
| Ni                             | 0.442409992 | 0.717190027 | 0.214729995 |
| Ni                             | 0.334980011 | 0.833850026 | 0.105070002 |
| Ni                             | 0.555559993 | 0.944440007 | 0.000000000 |
| Ni                             | 0.790579975 | 0.729070008 | 0.215220004 |
| Ni                             | 0.666630030 | 0.831749976 | 0.105350003 |
| Ni                             | 0.888890028 | 0.944440007 | 0.000000000 |
| H                              | 0.384600013 | 0.528199971 | 0.336820006 |
| C                              | 0.497799993 | 0.584349990 | 0.292970002 |
| O                              | 0.690190017 | 0.680249989 | 0.311239988 |
| Total energy (eV): -150.996109 |             |             |             |

### Hcp site

|    |             |             |             |
|----|-------------|-------------|-------------|
| Ni | 0.106008925 | 0.048429117 | 0.209843621 |
| Ni | 0.999178231 | 0.163597405 | 0.104718842 |
| Ni | 0.222220004 | 0.277779996 | 0.000000000 |
| Ni | 0.443246484 | 0.048611894 | 0.209417760 |
| Ni | 0.333886713 | 0.166398838 | 0.106179528 |
| Ni | 0.555559993 | 0.277779996 | 0.000000000 |
| Ni | 0.777145207 | 0.051340632 | 0.210404485 |
| Ni | 0.667042196 | 0.165068254 | 0.105667062 |
| Ni | 0.888890028 | 0.277779996 | 0.000000000 |
| Ni | 0.105770759 | 0.383361310 | 0.209735826 |
| Ni | 0.997961521 | 0.496211827 | 0.104677841 |
| Ni | 0.222220004 | 0.611109972 | 0.000000000 |
| Ni | 0.433829159 | 0.380289495 | 0.215853944 |
| Ni | 0.333576143 | 0.495433778 | 0.106063463 |
| Ni | 0.555559993 | 0.611109972 | 0.000000000 |
| Ni | 0.779047847 | 0.389391512 | 0.215008900 |
| Ni | 0.665540159 | 0.496947110 | 0.105094045 |
| Ni | 0.888890028 | 0.611109972 | 0.000000000 |
| Ni | 0.114415251 | 0.720129371 | 0.208784863 |
| Ni | 0.998077869 | 0.829718649 | 0.104706004 |
| Ni | 0.222220004 | 0.944440007 | 0.000000000 |
| Ni | 0.443206459 | 0.720777988 | 0.209358439 |
| Ni | 0.333252728 | 0.830683589 | 0.104256675 |
| Ni | 0.555559993 | 0.944440007 | 0.000000000 |
| Ni | 0.779445946 | 0.715492129 | 0.215206191 |
| Ni | 0.667258620 | 0.829580367 | 0.105673663 |
| Ni | 0.888890028 | 0.944440007 | 0.000000000 |
| H  | 0.843197763 | 0.581996024 | 0.336602658 |
| C  | 0.729132771 | 0.526933849 | 0.293051481 |
| O  | 0.536915600 | 0.432647556 | 0.311605871 |

Total energy (eV): -151.003333

### Species COH

#### Fcc site

|    |             |             |             |
|----|-------------|-------------|-------------|
| Ni | 0.111409999 | 0.054450002 | 0.210470006 |
| Ni | 0.000440000 | 0.165910006 | 0.105109997 |
| Ni | 0.222220004 | 0.277779996 | 0.000000000 |
| Ni | 0.444440007 | 0.054219998 | 0.210419998 |
| Ni | 0.333350003 | 0.165830001 | 0.105350003 |
| Ni | 0.555559993 | 0.277779996 | 0.000000000 |
| Ni | 0.780059993 | 0.058630001 | 0.210339993 |

|    |             |             |             |
|----|-------------|-------------|-------------|
| Ni | 0.666320026 | 0.165979996 | 0.105149999 |
| Ni | 0.888890028 | 0.277779996 | 0.000000000 |
| Ni | 0.108050004 | 0.386480004 | 0.210179999 |
| Ni | 0.000320000 | 0.499940008 | 0.105149999 |
| Ni | 0.222220004 | 0.611109972 | 0.000000000 |
| Ni | 0.443659991 | 0.386009991 | 0.214560002 |
| Ni | 0.334069997 | 0.499909997 | 0.104889996 |
| Ni | 0.555559993 | 0.611109972 | 0.000000000 |
| Ni | 0.779839993 | 0.386519998 | 0.210219994 |
| Ni | 0.666729987 | 0.500029981 | 0.104879998 |
| Ni | 0.888890028 | 0.611109972 | 0.000000000 |
| Ni | 0.111649998 | 0.721469998 | 0.210380003 |
| Ni | 0.999620020 | 0.832440019 | 0.105669998 |
| Ni | 0.222220004 | 0.944440007 | 0.000000000 |
| Ni | 0.445930004 | 0.722019970 | 0.215650007 |
| Ni | 0.333739996 | 0.832239985 | 0.105599999 |
| Ni | 0.555559993 | 0.944440007 | 0.000000000 |
| Ni | 0.778219998 | 0.722490013 | 0.215739995 |
| Ni | 0.666580021 | 0.832300007 | 0.105070002 |
| Ni | 0.888890028 | 0.944440007 | 0.000000000 |
| H  | 0.472530007 | 0.469639987 | 0.366380006 |
| C  | 0.553460002 | 0.603910029 | 0.276939988 |
| O  | 0.555339992 | 0.609350026 | 0.347079992 |

Total energy (eV): -151.250318

### Hcp site

|    |             |             |             |
|----|-------------|-------------|-------------|
| Ni | 0.110799998 | 0.054520000 | 0.210720003 |
| Ni | 0.999870002 | 0.165720001 | 0.105240002 |
| Ni | 0.222220004 | 0.277779996 | 0.000000000 |
| Ni | 0.442429990 | 0.050239999 | 0.210060000 |
| Ni | 0.333519995 | 0.166219994 | 0.105319999 |
| Ni | 0.555559993 | 0.277779996 | 0.000000000 |
| Ni | 0.778339982 | 0.054420002 | 0.210679993 |
| Ni | 0.666819990 | 0.166329995 | 0.105339997 |
| Ni | 0.888890028 | 0.277779996 | 0.000000000 |
| Ni | 0.110789999 | 0.386779994 | 0.210590005 |
| Ni | 0.998929977 | 0.498659998 | 0.105520003 |
| Ni | 0.222220004 | 0.611109972 | 0.000000000 |
| Ni | 0.442750007 | 0.385589987 | 0.214289993 |
| Ni | 0.334060013 | 0.498439997 | 0.105599999 |
| Ni | 0.555559993 | 0.611109972 | 0.000000000 |
| Ni | 0.777989984 | 0.385699987 | 0.214359999 |
| Ni | 0.666779995 | 0.499150008 | 0.103639998 |
| Ni | 0.888890028 | 0.611109972 | 0.000000000 |

|    |             |             |             |
|----|-------------|-------------|-------------|
| Ni | 0.114560001 | 0.722509980 | 0.210290000 |
| Ni | 0.998690009 | 0.831690013 | 0.105710000 |
| Ni | 0.222220004 | 0.944440007 | 0.000000000 |
| Ni | 0.442909986 | 0.722360015 | 0.210319996 |
| Ni | 0.333209991 | 0.831910014 | 0.104939997 |
| Ni | 0.555559993 | 0.944440007 | 0.000000000 |
| Ni | 0.779030025 | 0.722490013 | 0.215289995 |
| Ni | 0.667280018 | 0.831520021 | 0.105760001 |
| Ni | 0.888890028 | 0.944440007 | 0.000000000 |
| H  | 0.582769990 | 0.356680006 | 0.363279998 |
| C  | 0.666649997 | 0.499779999 | 0.275629997 |
| O  | 0.666069984 | 0.498580009 | 0.345759988 |

Total energy (eV): -151.252017

### Species CH<sub>2</sub>O

#### Fcc site

|    |             |             |             |
|----|-------------|-------------|-------------|
| Ni | 0.112010002 | 0.055240002 | 0.210339993 |
| Ni | 0.000840000 | 0.166400000 | 0.104620002 |
| Ni | 0.222220004 | 0.277779996 | 0.000000000 |
| Ni | 0.445349991 | 0.054000001 | 0.209629998 |
| Ni | 0.334910005 | 0.170149997 | 0.106830001 |
| Ni | 0.555559993 | 0.277779996 | 0.000000000 |
| Ni | 0.780900002 | 0.056669999 | 0.209020004 |
| Ni | 0.666050017 | 0.165309995 | 0.104249999 |
| Ni | 0.888890028 | 0.277779996 | 0.000000000 |
| Ni | 0.110760003 | 0.386720002 | 0.209059998 |
| Ni | 0.001620000 | 0.500959992 | 0.104259998 |
| Ni | 0.222220004 | 0.611109972 | 0.000000000 |
| Ni | 0.447629988 | 0.385850012 | 0.215509996 |
| Ni | 0.336039990 | 0.501359999 | 0.105549999 |
| Ni | 0.555559993 | 0.611109972 | 0.000000000 |
| Ni | 0.783550024 | 0.383569986 | 0.208330005 |
| Ni | 0.666530013 | 0.500240028 | 0.105460003 |
| Ni | 0.888890028 | 0.611109972 | 0.000000000 |
| Ni | 0.113569997 | 0.721859992 | 0.209619999 |
| Ni | 0.996969998 | 0.832120001 | 0.106799997 |
| Ni | 0.222220004 | 0.944440007 | 0.000000000 |
| Ni | 0.441619992 | 0.726849973 | 0.214450002 |
| Ni | 0.333739996 | 0.833400011 | 0.104429998 |
| Ni | 0.555559993 | 0.944440007 | 0.000000000 |
| Ni | 0.781729996 | 0.719259977 | 0.215240002 |
| Ni | 0.665939987 | 0.831080019 | 0.105449997 |
| Ni | 0.888890028 | 0.944440007 | 0.000000000 |

|                                |             |             |             |
|--------------------------------|-------------|-------------|-------------|
| H                              | 0.343730003 | 0.584410012 | 0.337689996 |
| H                              | 0.593200028 | 0.830179989 | 0.337080002 |
| C                              | 0.493580014 | 0.680220008 | 0.311379999 |
| O                              | 0.595520020 | 0.573530018 | 0.295349985 |
| Total energy (eV): -154.595915 |             |             |             |

### Hcp site

|                                |             |             |             |
|--------------------------------|-------------|-------------|-------------|
| Ni                             | 0.109789997 | 0.054380000 | 0.209330007 |
| Ni                             | 0.001360000 | 0.169180006 | 0.105060004 |
| Ni                             | 0.222220004 | 0.277779996 | 0.000000000 |
| Ni                             | 0.444959998 | 0.057440002 | 0.210280001 |
| Ni                             | 0.336100012 | 0.171279997 | 0.106640004 |
| Ni                             | 0.555559993 | 0.277779996 | 0.000000000 |
| Ni                             | 0.777310014 | 0.057270002 | 0.209710002 |
| Ni                             | 0.667259991 | 0.167840004 | 0.104659997 |
| Ni                             | 0.888890028 | 0.277779996 | 0.000000000 |
| Ni                             | 0.100749999 | 0.385989994 | 0.214990005 |
| Ni                             | 0.000970000 | 0.500400007 | 0.104999997 |
| Ni                             | 0.222220004 | 0.611109972 | 0.000000000 |
| Ni                             | 0.444189996 | 0.391030014 | 0.215780005 |
| Ni                             | 0.332470000 | 0.500370026 | 0.105499998 |
| Ni                             | 0.555559993 | 0.611109972 | 0.000000000 |
| Ni                             | 0.776340008 | 0.389010012 | 0.209849998 |
| Ni                             | 0.664550006 | 0.499890000 | 0.105729997 |
| Ni                             | 0.888890028 | 0.611109972 | 0.000000000 |
| Ni                             | 0.109630004 | 0.724609971 | 0.209199995 |
| Ni                             | 0.001710000 | 0.834990025 | 0.103890002 |
| Ni                             | 0.222220004 | 0.944440007 | 0.000000000 |
| Ni                             | 0.446520001 | 0.724740028 | 0.214709997 |
| Ni                             | 0.336189985 | 0.833419979 | 0.106440000 |
| Ni                             | 0.555559993 | 0.944440007 | 0.000000000 |
| Ni                             | 0.786029994 | 0.727739990 | 0.208370000 |
| Ni                             | 0.665239990 | 0.833490014 | 0.105370000 |
| Ni                             | 0.888890028 | 0.944440007 | 0.000000000 |
| H                              | 0.148809999 | 0.298810005 | 0.338559985 |
| H                              | 0.158960000 | 0.551199973 | 0.335990012 |
| C                              | 0.206619993 | 0.447959989 | 0.311379999 |
| O                              | 0.415320009 | 0.545469999 | 0.295859993 |
| Total energy (eV): -154.585065 |             |             |             |

### Species CH<sub>3</sub>O

|    |             |             |             |
|----|-------------|-------------|-------------|
| Ni | 0.111139998 | 0.055130001 | 0.210109994 |
| Ni | 0.000380000 | 0.165950000 | 0.104520001 |



|    |             |             |             |
|----|-------------|-------------|-------------|
| Ni | 0.222220004 | 0.277779996 | 0.000000000 |
| Ni | 0.444709986 | 0.054760002 | 0.210069999 |
| Ni | 0.334340006 | 0.168410003 | 0.106219999 |
| Ni | 0.555559993 | 0.277779996 | 0.000000000 |
| Ni | 0.780319989 | 0.059880000 | 0.209140003 |
| Ni | 0.665740013 | 0.165920004 | 0.104460001 |
| Ni | 0.888890028 | 0.277779996 | 0.000000000 |
| Ni | 0.106380001 | 0.385960013 | 0.209030002 |
| Ni | 0.000520000 | 0.500769973 | 0.104450002 |
| Ni | 0.222220004 | 0.611109972 | 0.000000000 |
| Ni | 0.440800011 | 0.380140007 | 0.212909997 |
| Ni | 0.334470004 | 0.500419974 | 0.105180003 |
| Ni | 0.555559993 | 0.611109972 | 0.000000000 |
| Ni | 0.780610025 | 0.385679990 | 0.208820000 |
| Ni | 0.666109979 | 0.500490010 | 0.105070002 |
| Ni | 0.888890028 | 0.611109972 | 0.000000000 |
| Ni | 0.111479998 | 0.721610010 | 0.210089996 |
| Ni | 0.997870028 | 0.832029998 | 0.106279999 |
| Ni | 0.222220004 | 0.944440007 | 0.000000000 |
| Ni | 0.440730006 | 0.725210011 | 0.213960007 |
| Ni | 0.334679991 | 0.831849992 | 0.106399998 |
| Ni | 0.555559993 | 0.944440007 | 0.000000000 |
| Ni | 0.786159992 | 0.725489974 | 0.213259995 |
| Ni | 0.666029990 | 0.831870019 | 0.105279997 |
| Ni | 0.888890028 | 0.944440007 | 0.000000000 |
| H  | 0.644339979 | 0.519029975 | 0.372280002 |
| H  | 0.640709996 | 0.757669985 | 0.377609998 |
| H  | 0.401300013 | 0.514190018 | 0.376349986 |
| C  | 0.560959995 | 0.599319994 | 0.356480002 |
| O  | 0.557030022 | 0.607890010 | 0.281140000 |

Total energy (eV): -158.789371

### Species HCOH

|    |             |             |             |
|----|-------------|-------------|-------------|
| Ni | 0.119252205 | 0.062663749 | 0.216864094 |
| Ni | 0.001556178 | 0.167489767 | 0.105201475 |
| Ni | 0.222220004 | 0.277779996 | 0.000000000 |
| Ni | 0.447041124 | 0.056169827 | 0.209408417 |
| Ni | 0.330831230 | 0.165479645 | 0.104351990 |
| Ni | 0.555559993 | 0.277779996 | 0.000000000 |
| Ni | 0.774918795 | 0.054636102 | 0.208427742 |
| Ni | 0.667434931 | 0.168125048 | 0.104235843 |
| Ni | 0.888890028 | 0.277779996 | 0.000000000 |
| Ni | 0.120999567 | 0.392439425 | 0.216121241 |
| Ni | 0.000466820 | 0.499767721 | 0.105767637 |

|    |             |             |             |
|----|-------------|-------------|-------------|
| Ni | 0.222220004 | 0.611109972 | 0.000000000 |
| Ni | 0.448190153 | 0.393168271 | 0.207694396 |
| Ni | 0.330546290 | 0.499574542 | 0.104167171 |
| Ni | 0.555559993 | 0.611109972 | 0.000000000 |
| Ni | 0.779638469 | 0.390564740 | 0.209926367 |
| Ni | 0.667493880 | 0.500855923 | 0.104328744 |
| Ni | 0.888890028 | 0.611109972 | 0.000000000 |
| Ni | 0.112709872 | 0.724009633 | 0.210704818 |
| Ni | 0.001195536 | 0.835528195 | 0.106080607 |
| Ni | 0.222220004 | 0.944440007 | 0.000000000 |
| Ni | 0.446884871 | 0.726523101 | 0.209412649 |
| Ni | 0.331548959 | 0.833160996 | 0.104562320 |
| Ni | 0.555559993 | 0.944440007 | 0.000000000 |
| Ni | 0.780967116 | 0.724797726 | 0.209964812 |
| Ni | 0.667510152 | 0.833102822 | 0.104235299 |
| Ni | 0.888890028 | 0.944440007 | 0.000000000 |
| H  | 0.471883953 | 0.364249349 | 0.322961211 |
| H  | 0.040561069 | 0.211588174 | 0.320795983 |
| C  | 0.186441571 | 0.257743865 | 0.292122215 |
| O  | 0.333842725 | 0.321821213 | 0.343330026 |

Total energy (eV): -154.425573

### Species CH<sub>2</sub>OH

|    |             |             |             |
|----|-------------|-------------|-------------|
| Ni | 0.109389998 | 0.054380000 | 0.210189998 |
| Ni | 0.000480000 | 0.166669995 | 0.104680002 |
| Ni | 0.222220004 | 0.277779996 | 0.000000000 |
| Ni | 0.444620013 | 0.053860001 | 0.209810004 |
| Ni | 0.334840000 | 0.170080006 | 0.106720001 |
| Ni | 0.555559993 | 0.277779996 | 0.000000000 |
| Ni | 0.778659999 | 0.056000002 | 0.209790006 |
| Ni | 0.666719973 | 0.166669995 | 0.104709998 |
| Ni | 0.888890028 | 0.277779996 | 0.000000000 |
| Ni | 0.110710002 | 0.388709992 | 0.209470004 |
| Ni | 0.001110000 | 0.501129985 | 0.104249999 |
| Ni | 0.222220004 | 0.611109972 | 0.000000000 |
| Ni | 0.446029991 | 0.388209999 | 0.215859994 |
| Ni | 0.335460007 | 0.499229997 | 0.105489999 |
| Ni | 0.555559993 | 0.611109972 | 0.000000000 |
| Ni | 0.782019973 | 0.386929989 | 0.208660007 |
| Ni | 0.666960001 | 0.501860023 | 0.106190003 |
| Ni | 0.888890028 | 0.611109972 | 0.000000000 |
| Ni | 0.111340001 | 0.722429991 | 0.209629998 |
| Ni | 0.997500002 | 0.832700014 | 0.106009997 |
| Ni | 0.222220004 | 0.944440007 | 0.000000000 |

|                                |             |             |             |
|--------------------------------|-------------|-------------|-------------|
| Ni                             | 0.442369998 | 0.725989997 | 0.207949996 |
| Ni                             | 0.332780004 | 0.834299982 | 0.104079999 |
| Ni                             | 0.555559993 | 0.944440007 | 0.000000000 |
| Ni                             | 0.774649978 | 0.720730007 | 0.218590006 |
| Ni                             | 0.668730021 | 0.832189977 | 0.105329998 |
| Ni                             | 0.888890028 | 0.944440007 | 0.000000000 |
| H                              | 0.819620013 | 0.627460003 | 0.340510011 |
| H                              | 0.695089996 | 0.782720029 | 0.342709988 |
| H                              | 0.396070004 | 0.498730004 | 0.332219988 |
| C                              | 0.701770008 | 0.654990017 | 0.316560000 |
| O                              | 0.504599988 | 0.463620007 | 0.324039996 |
| Total energy (eV): -158.115681 |             |             |             |

### Species CH<sub>3</sub>OH

|    |             |             |             |
|----|-------------|-------------|-------------|
| Ni | 0.113190003 | 0.049729999 | 0.210350007 |
| Ni | 0.003100000 | 0.163589999 | 0.105300002 |
| Ni | 0.222220004 | 0.277779996 | 0.000000000 |
| Ni | 0.448509991 | 0.048439998 | 0.209649995 |
| Ni | 0.337489992 | 0.165999994 | 0.106459998 |
| Ni | 0.555559993 | 0.277779996 | 0.000000000 |
| Ni | 0.781359971 | 0.050799999 | 0.210679993 |
| Ni | 0.669610023 | 0.163399994 | 0.104860000 |
| Ni | 0.888890028 | 0.277779996 | 0.000000000 |
| Ni | 0.114079997 | 0.384620011 | 0.210079998 |
| Ni | 0.003510000 | 0.497350007 | 0.104780003 |
| Ni | 0.222220004 | 0.611109972 | 0.000000000 |
| Ni | 0.450080007 | 0.383650005 | 0.217209995 |
| Ni | 0.337559998 | 0.495829999 | 0.106270000 |
| Ni | 0.555559993 | 0.611109972 | 0.000000000 |
| Ni | 0.784290016 | 0.384149998 | 0.209120005 |
| Ni | 0.667379975 | 0.495689988 | 0.105939999 |
| Ni | 0.888890028 | 0.611109972 | 0.000000000 |
| Ni | 0.115189999 | 0.717840016 | 0.210419998 |
| Ni | 0.003370000 | 0.830510020 | 0.105049998 |
| Ni | 0.222220004 | 0.944440007 | 0.000000000 |
| Ni | 0.448410004 | 0.719389975 | 0.210060000 |
| Ni | 0.335970014 | 0.830079973 | 0.104730003 |
| Ni | 0.555559993 | 0.944440007 | 0.000000000 |
| Ni | 0.783320010 | 0.720369995 | 0.209619999 |
| Ni | 0.669539988 | 0.830160022 | 0.105030000 |
| Ni | 0.888890028 | 0.944440007 | 0.000000000 |
| H  | 0.777090013 | 0.526899993 | 0.352970004 |
| H  | 0.627229989 | 0.250569999 | 0.357369989 |
| H  | 0.605620027 | 0.403409988 | 0.426640004 |

|                                |             |             |             |
|--------------------------------|-------------|-------------|-------------|
| H                              | 0.449169993 | 0.511110008 | 0.341639996 |
| C                              | 0.628139973 | 0.394600004 | 0.369919986 |
| O                              | 0.456519991 | 0.386830002 | 0.331440002 |
| Total energy (eV): -162.202297 |             |             |             |

**Table S2:** Cartesian coordinates, total energies and imaginary frequencies for transition state structures involved in methane synthesis from syngas on Ni(111) surface.

**TS1**

|    |             |             |             |
|----|-------------|-------------|-------------|
| Ni | 0.114349999 | 0.057590000 | 0.211700007 |
| Ni | 0.001250000 | 0.166250005 | 0.105350003 |
| Ni | 0.222220004 | 0.277779996 | 0.000000000 |
| Ni | 0.445309997 | 0.057480000 | 0.210969999 |
| Ni | 0.334740013 | 0.168380007 | 0.105970003 |
| Ni | 0.555559993 | 0.277779996 | 0.000000000 |
| Ni | 0.781799972 | 0.061260000 | 0.210569993 |
| Ni | 0.666670024 | 0.166189998 | 0.105319999 |
| Ni | 0.888890028 | 0.277779996 | 0.000000000 |
| Ni | 0.109260000 | 0.388579994 | 0.210449994 |
| Ni | 0.000790000 | 0.500339985 | 0.105219997 |
| Ni | 0.222220004 | 0.611109972 | 0.000000000 |
| Ni | 0.441170007 | 0.386759996 | 0.218189999 |
| Ni | 0.335420012 | 0.500750005 | 0.105570003 |
| Ni | 0.555559993 | 0.611109972 | 0.000000000 |
| Ni | 0.780080020 | 0.388399988 | 0.210089996 |
| Ni | 0.666429996 | 0.500599980 | 0.105700001 |
| Ni | 0.888890028 | 0.611109972 | 0.000000000 |
| Ni | 0.113289997 | 0.722530007 | 0.210370004 |
| Ni | 0.000160000 | 0.833180010 | 0.106059998 |
| Ni | 0.222220004 | 0.944440007 | 0.000000000 |
| Ni | 0.449389994 | 0.728489995 | 0.213870004 |
| Ni | 0.333990008 | 0.833369970 | 0.105389997 |
| Ni | 0.555559993 | 0.944440007 | 0.000000000 |
| Ni | 0.783550024 | 0.727379978 | 0.215340003 |
| Ni | 0.667750001 | 0.833159983 | 0.104419999 |
| Ni | 0.888890028 | 0.944440007 | 0.000000000 |
| H  | 0.391009986 | 0.374790013 | 0.305889994 |
| C  | 0.570010006 | 0.633170009 | 0.278169990 |
| O  | 0.511560023 | 0.553680003 | 0.338730007 |

Total energy (eV): -150.234740

Imaginary frequency (cm<sup>-1</sup>): 1559*i*

**TS2**

|    |             |             |             |
|----|-------------|-------------|-------------|
| Ni | 0.111080900 | 0.055105463 | 0.209738225 |
| Ni | 0.998248458 | 0.164221331 | 0.104680553 |
| Ni | 0.222220004 | 0.277779996 | 0.000000000 |
| Ni | 0.442344248 | 0.052159511 | 0.210080191 |
| Ni | 0.332338691 | 0.166661486 | 0.105338871 |

|    |             |             |             |
|----|-------------|-------------|-------------|
| Ni | 0.555559993 | 0.277779996 | 0.000000000 |
| Ni | 0.775905550 | 0.057106696 | 0.209312081 |
| Ni | 0.664071858 | 0.164694518 | 0.104586206 |
| Ni | 0.888890028 | 0.277779996 | 0.000000000 |
| Ni | 0.101872474 | 0.384124875 | 0.208909079 |
| Ni | 0.998266101 | 0.499597967 | 0.104482695 |
| Ni | 0.222220004 | 0.611109972 | 0.000000000 |
| Ni | 0.439226747 | 0.384261191 | 0.214851201 |
| Ni | 0.331933051 | 0.499085605 | 0.104829416 |
| Ni | 0.555559993 | 0.611109972 | 0.000000000 |
| Ni | 0.775775015 | 0.384176284 | 0.209151149 |
| Ni | 0.663542151 | 0.499864012 | 0.106010333 |
| Ni | 0.888890028 | 0.611109972 | 0.000000000 |
| Ni | 0.112431481 | 0.720421672 | 0.210043088 |
| Ni | 0.994873703 | 0.829856873 | 0.106506959 |
| Ni | 0.222220004 | 0.944440007 | 0.000000000 |
| Ni | 0.439764291 | 0.716055155 | 0.214591950 |
| Ni | 0.331535310 | 0.831839144 | 0.105167896 |
| Ni | 0.555559993 | 0.944440007 | 0.000000000 |
| Ni | 0.784667850 | 0.725287378 | 0.216089159 |
| Ni | 0.663098633 | 0.829708695 | 0.105596542 |
| Ni | 0.888890028 | 0.944440007 | 0.000000000 |
| H  | 0.409670889 | 0.447414786 | 0.309636861 |
| C  | 0.535172403 | 0.603746295 | 0.285800338 |
| O  | 0.698590636 | 0.712441087 | 0.320806086 |

Total energy (eV): -150.794015

Imaginary frequency (cm<sup>-1</sup>): 303i

### TS3

|    |             |             |             |
|----|-------------|-------------|-------------|
| Ni | 0.103519998 | 0.050620001 | 0.210109994 |
| Ni | 0.999459982 | 0.170839995 | 0.107029997 |
| Ni | 0.222220004 | 0.277779996 | 0.000000000 |
| Ni | 0.439500004 | 0.056740001 | 0.217999995 |
| Ni | 0.327850014 | 0.160260007 | 0.101480000 |
| Ni | 0.555559993 | 0.277779996 | 0.000000000 |
| Ni | 0.775439978 | 0.058169998 | 0.211830005 |
| Ni | 0.663689971 | 0.169560000 | 0.108220004 |
| Ni | 0.888890028 | 0.277779996 | 0.000000000 |
| Ni | 0.112410001 | 0.388399988 | 0.220719993 |
| Ni | 0.998199999 | 0.497869998 | 0.109660000 |
| Ni | 0.222220004 | 0.611109972 | 0.000000000 |
| Ni | 0.448350012 | 0.382669985 | 0.197909996 |
| Ni | 0.330080003 | 0.502900004 | 0.102689996 |
| Ni | 0.555559993 | 0.611109972 | 0.000000000 |
| Ni | 0.775250018 | 0.393519998 | 0.218740001 |

|    |             |             |             |
|----|-------------|-------------|-------------|
| Ni | 0.672599971 | 0.505029976 | 0.101620004 |
| Ni | 0.888890028 | 0.611109972 | 0.000000000 |
| Ni | 0.108159997 | 0.724740028 | 0.212050006 |
| Ni | 0.999689996 | 0.833220005 | 0.105310000 |
| Ni | 0.222220004 | 0.944440007 | 0.000000000 |
| Ni | 0.445149988 | 0.721459985 | 0.220369995 |
| Ni | 0.334879994 | 0.834559977 | 0.109449998 |
| Ni | 0.555559993 | 0.944440007 | 0.000000000 |
| Ni | 0.781949997 | 0.729309976 | 0.210229993 |
| Ni | 0.662419975 | 0.833790004 | 0.107009999 |
| Ni | 0.888679981 | 0.944660008 | 0.001129985 |
| C  | 0.356339991 | 0.479609996 | 0.268440008 |
| O  | 0.501179993 | 0.340649992 | 0.287999988 |

Total energy (eV): -144.550423

Imaginary frequency (cm<sup>-1</sup>): 537i

#### TS4

|    |             |             |             |
|----|-------------|-------------|-------------|
| Ni | 0.105099998 | 0.048650000 | 0.209419996 |
| Ni | 0.000930000 | 0.167469993 | 0.105430000 |
| Ni | 0.222220004 | 0.277779996 | 0.000000000 |
| Ni | 0.443250000 | 0.049210001 | 0.209639996 |
| Ni | 0.333370000 | 0.164739996 | 0.105269998 |
| Ni | 0.555559993 | 0.277779996 | 0.000000000 |
| Ni | 0.779959977 | 0.062849998 | 0.210309997 |
| Ni | 0.667209983 | 0.168300003 | 0.105439998 |
| Ni | 0.888890028 | 0.277779996 | 0.000000000 |
| Ni | 0.106430002 | 0.388090014 | 0.212610006 |
| Ni | 0.997680008 | 0.497770011 | 0.106409997 |
| Ni | 0.222220004 | 0.611109972 | 0.000000000 |
| Ni | 0.428970009 | 0.368019998 | 0.214220002 |
| Ni | 0.333790004 | 0.500230014 | 0.105319999 |
| Ni | 0.555559993 | 0.611109972 | 0.000000000 |
| Ni | 0.773150027 | 0.392520010 | 0.216509998 |
| Ni | 0.664879978 | 0.499139994 | 0.104269996 |
| Ni | 0.888890028 | 0.611109972 | 0.000000000 |
| Ni | 0.111860000 | 0.724420011 | 0.209670007 |
| Ni | 0.999849975 | 0.832140028 | 0.103739999 |
| Ni | 0.222220004 | 0.944440007 | 0.000000000 |
| Ni | 0.448069990 | 0.726249993 | 0.216729999 |
| Ni | 0.334729999 | 0.830780029 | 0.106160000 |
| Ni | 0.555559993 | 0.944440007 | 0.000000000 |
| Ni | 0.783510029 | 0.728850007 | 0.212170005 |
| Ni | 0.666180015 | 0.833970010 | 0.105559997 |
| Ni | 0.888890028 | 0.944440007 | 0.000000000 |
| H  | 0.675620019 | 0.513509989 | 0.333330005 |

|   |             |             |             |
|---|-------------|-------------|-------------|
| C | 0.657350004 | 0.520099998 | 0.276380002 |
| O | 0.422529995 | 0.539870024 | 0.284640014 |

Total energy (eV): -149.834977  
Imaginary frequency (cm<sup>-1</sup>): 515*i*

### TS5

|    |             |             |             |
|----|-------------|-------------|-------------|
| Ni | 0.108029999 | 0.059599999 | 0.215299994 |
| Ni | 0.003080000 | 0.171049997 | 0.105449997 |
| Ni | 0.222220004 | 0.277779996 | 0.000000000 |
| Ni | 0.450780004 | 0.063040003 | 0.211400002 |
| Ni | 0.333400011 | 0.168850005 | 0.105190001 |
| Ni | 0.555559993 | 0.277779996 | 0.000000000 |
| Ni | 0.776009977 | 0.057969999 | 0.209889993 |
| Ni | 0.668940008 | 0.170839995 | 0.105099998 |
| Ni | 0.888890028 | 0.277779996 | 0.000000000 |
| Ni | 0.120999999 | 0.389889985 | 0.217529997 |
| Ni | 0.003300000 | 0.502340019 | 0.106579997 |
| Ni | 0.222220004 | 0.611109972 | 0.000000000 |
| Ni | 0.457399994 | 0.402069986 | 0.210449994 |
| Ni | 0.333700001 | 0.502659976 | 0.105449997 |
| Ni | 0.555559993 | 0.611109972 | 0.000000000 |
| Ni | 0.784020007 | 0.393779993 | 0.211390004 |
| Ni | 0.669330001 | 0.503390014 | 0.105159998 |
| Ni | 0.888890028 | 0.611109972 | 0.000000000 |
| Ni | 0.116039999 | 0.726670027 | 0.210789993 |
| Ni | 0.003870000 | 0.837320030 | 0.105700001 |
| Ni | 0.222220004 | 0.944440007 | 0.000000000 |
| Ni | 0.448350012 | 0.731100023 | 0.210250005 |
| Ni | 0.335189998 | 0.837010026 | 0.105120003 |
| Ni | 0.555559993 | 0.944440007 | 0.000000000 |
| Ni | 0.784749985 | 0.729470015 | 0.210419998 |
| Ni | 0.669290006 | 0.836120009 | 0.105020002 |
| Ni | 0.888890028 | 0.944440007 | 0.000000000 |
| H  | 0.059230000 | 0.230800003 | 0.332269996 |
| H  | 0.471590012 | 0.252570003 | 0.276410013 |
| C  | 0.177560002 | 0.241870001 | 0.294200003 |
| O  | 0.350719988 | 0.285010010 | 0.325760007 |

Total energy (eV): -153.850959  
Imaginary frequency (cm<sup>-1</sup>): 1296*i*

### TS6

|    |             |             |             |
|----|-------------|-------------|-------------|
| Ni | 0.110780001 | 0.051430002 | 0.210079998 |
| Ni | 0.999310017 | 0.163479999 | 0.104809999 |
| Ni | 0.222220004 | 0.277779996 | 0.000000000 |
| Ni | 0.442539990 | 0.049770001 | 0.210060000 |



|    |             |             |             |
|----|-------------|-------------|-------------|
| Ni | 0.331970006 | 0.162949994 | 0.104599997 |
| Ni | 0.555559993 | 0.277779996 | 0.000000000 |
| Ni | 0.778020024 | 0.055950001 | 0.209270000 |
| Ni | 0.665319979 | 0.163839996 | 0.104780003 |
| Ni | 0.888890028 | 0.277779996 | 0.000000000 |
| Ni | 0.108400002 | 0.383810014 | 0.209969997 |
| Ni | 0.999140024 | 0.497649997 | 0.104790002 |
| Ni | 0.222220004 | 0.611109972 | 0.000000000 |
| Ni | 0.438089997 | 0.377299994 | 0.208969995 |
| Ni | 0.333829999 | 0.499779999 | 0.105339997 |
| Ni | 0.555559993 | 0.611109972 | 0.000000000 |
| Ni | 0.776669979 | 0.383210003 | 0.209840000 |
| Ni | 0.667020023 | 0.500689983 | 0.106040001 |
| Ni | 0.888890028 | 0.611109972 | 0.000000000 |
| Ni | 0.111500002 | 0.716759980 | 0.210189998 |
| Ni | 0.995289981 | 0.828360021 | 0.106859997 |
| Ni | 0.222220004 | 0.944440007 | 0.000000000 |
| Ni | 0.442050010 | 0.714060009 | 0.216820002 |
| Ni | 0.333339989 | 0.829240024 | 0.105700001 |
| Ni | 0.555559993 | 0.944440007 | 0.000000000 |
| Ni | 0.774020016 | 0.716400027 | 0.218439996 |
| Ni | 0.665229976 | 0.829370022 | 0.105850004 |
| Ni | 0.888890028 | 0.944440007 | 0.000000000 |
| H  | 0.503139973 | 0.814379990 | 0.339179993 |
| H  | 0.399749994 | 0.530560017 | 0.333570004 |
| C  | 0.519219995 | 0.686990023 | 0.315959990 |
| O  | 0.712899983 | 0.719820023 | 0.312669992 |

Total energy (eV): -154.302022

Imaginary frequency (cm<sup>-1</sup>): 111i

### TS7

|    |             |             |             |
|----|-------------|-------------|-------------|
| Ni | 0.114349999 | 0.054620001 | 0.210449994 |
| Ni | 0.001150000 | 0.164790004 | 0.105379999 |
| Ni | 0.222220004 | 0.277779996 | 0.000000000 |
| Ni | 0.449829996 | 0.060120001 | 0.209920004 |
| Ni | 0.334039986 | 0.164560005 | 0.104440004 |
| Ni | 0.555559993 | 0.277779996 | 0.000000000 |
| Ni | 0.782540023 | 0.055810001 | 0.210229993 |
| Ni | 0.669030011 | 0.165560007 | 0.105020002 |
| Ni | 0.888890028 | 0.277779996 | 0.000000000 |
| Ni | 0.113920003 | 0.384660006 | 0.214430004 |
| Ni | 0.002950000 | 0.499639988 | 0.104750000 |
| Ni | 0.222220004 | 0.611109972 | 0.000000000 |
| Ni | 0.449589998 | 0.383819997 | 0.208930001 |
| Ni | 0.334879994 | 0.500349998 | 0.105860002 |

|    |             |             |             |
|----|-------------|-------------|-------------|
| Ni | 0.555559993 | 0.611109972 | 0.000000000 |
| Ni | 0.778880000 | 0.387100011 | 0.210240006 |
| Ni | 0.669110000 | 0.499630004 | 0.104769997 |
| Ni | 0.888890028 | 0.611109972 | 0.000000000 |
| Ni | 0.115920000 | 0.725520015 | 0.214129999 |
| Ni | 0.001010000 | 0.832369983 | 0.105169997 |
| Ni | 0.222220004 | 0.944440007 | 0.000000000 |
| Ni | 0.450619996 | 0.721710026 | 0.220269993 |
| Ni | 0.335750014 | 0.830399990 | 0.106389999 |
| Ni | 0.555559993 | 0.944440007 | 0.000000000 |
| Ni | 0.782989979 | 0.721400023 | 0.209950000 |
| Ni | 0.664860010 | 0.830540001 | 0.106550001 |
| Ni | 0.888890028 | 0.944440007 | 0.000000000 |
| H  | 0.463479996 | 0.592180014 | 0.334320009 |
| H  | 0.122239999 | 0.569040000 | 0.332879990 |
| C  | 0.185990006 | 0.589969993 | 0.279680014 |
| O  | 0.455779999 | 0.715030015 | 0.321190000 |

Total energy (eV): -153.634830

Imaginary frequency (cm<sup>-1</sup>): 302i

### TS8

|    |             |             |             |
|----|-------------|-------------|-------------|
| Ni | 0.996280015 | 0.993950009 | 0.210749999 |
| Ni | 0.219420001 | 0.104999997 | 0.103710003 |
| Ni | 0.111110002 | 0.222220004 | 0.000000000 |
| Ni | 0.329270005 | 0.997049987 | 0.209610000 |
| Ni | 0.553919971 | 0.107869998 | 0.105060004 |
| Ni | 0.444440007 | 0.222220004 | 0.000000000 |
| Ni | 0.668060005 | 0.002720000 | 0.209380001 |
| Ni | 0.888650000 | 0.107660003 | 0.104680002 |
| Ni | 0.777779996 | 0.222220004 | 0.000000000 |
| Ni | 0.993870020 | 0.325729996 | 0.210219994 |
| Ni | 0.221110001 | 0.441980004 | 0.104180001 |
| Ni | 0.111110002 | 0.555559993 | 0.000000000 |
| Ni | 0.326150000 | 0.319409996 | 0.206829995 |
| Ni | 0.556800008 | 0.444950014 | 0.105980001 |
| Ni | 0.444440007 | 0.555559993 | 0.000000000 |
| Ni | 0.663020015 | 0.330659986 | 0.210690007 |
| Ni | 0.887750030 | 0.441130012 | 0.105319999 |
| Ni | 0.777779996 | 0.555559993 | 0.000000000 |
| Ni | 0.992039979 | 0.660820007 | 0.211590007 |
| Ni | 0.220019996 | 0.772310019 | 0.105750002 |
| Ni | 0.111110002 | 0.888890028 | 0.000000000 |
| Ni | 0.325269997 | 0.657220006 | 0.214049995 |
| Ni | 0.553049982 | 0.772650003 | 0.106059998 |
| Ni | 0.444440007 | 0.888890028 | 0.000000000 |

|    |             |             |             |
|----|-------------|-------------|-------------|
| Ni | 0.654269993 | 0.667190015 | 0.221200004 |
| Ni | 0.884440005 | 0.771539986 | 0.107129999 |
| Ni | 0.777779996 | 0.888890028 | 0.000000000 |
| H  | 0.411680013 | 0.405510008 | 0.327190012 |
| H  | 0.524240017 | 0.827300012 | 0.328330010 |
| H  | 0.248280004 | 0.634450018 | 0.288500011 |
| C  | 0.469969988 | 0.680019975 | 0.300150007 |
| O  | 0.447600007 | 0.537289977 | 0.350259990 |

Total energy (eV): -157.494167

Imaginary frequency (cm<sup>-1</sup>): 841*i*

### TS9

|    |             |             |             |
|----|-------------|-------------|-------------|
| Ni | 0.128470004 | 0.070880003 | 0.221230000 |
| Ni | 0.009590030 | 0.172419995 | 0.105800003 |
| Ni | 0.222220004 | 0.277779996 | 0.000000000 |
| Ni | 0.460740000 | 0.063220002 | 0.210219994 |
| Ni | 0.340820014 | 0.172240004 | 0.106909998 |
| Ni | 0.555559993 | 0.277779996 | 0.000000000 |
| Ni | 0.788089991 | 0.064989999 | 0.211860001 |
| Ni | 0.675750017 | 0.172610000 | 0.105269998 |
| Ni | 0.888890028 | 0.277779996 | 0.000000000 |
| Ni | 0.114210002 | 0.401410013 | 0.213369995 |
| Ni | 0.009960055 | 0.507420003 | 0.105439998 |
| Ni | 0.222220004 | 0.611109972 | 0.000000000 |
| Ni | 0.467489988 | 0.403409988 | 0.211239994 |
| Ni | 0.340660006 | 0.505890012 | 0.105180003 |
| Ni | 0.555559993 | 0.611109972 | 0.000000000 |
| Ni | 0.791109979 | 0.400290012 | 0.208939999 |
| Ni | 0.675960004 | 0.506690025 | 0.103890002 |
| Ni | 0.888890028 | 0.611109972 | 0.000000000 |
| Ni | 0.125159994 | 0.738189995 | 0.209710002 |
| Ni | 0.010259986 | 0.843249977 | 0.106619999 |
| Ni | 0.222220004 | 0.944440007 | 0.000000000 |
| Ni | 0.461620003 | 0.730679989 | 0.217759997 |
| Ni | 0.343270004 | 0.838169992 | 0.106080003 |
| Ni | 0.555559993 | 0.944440007 | 0.000000000 |
| Ni | 0.796400011 | 0.733910024 | 0.211160004 |
| Ni | 0.673629999 | 0.839250028 | 0.106710002 |
| Ni | 0.888890028 | 0.944440007 | 0.000000000 |
| H  | 0.386599988 | 0.638000011 | 0.316190004 |
| H  | 0.483830005 | 0.466600001 | 0.333759993 |
| C  | 0.432579994 | 0.530910015 | 0.291280001 |
| O  | 0.145600006 | 0.261040002 | 0.286859989 |

Total energy (eV): -153.186681

Imaginary frequency (cm<sup>-1</sup>): 374*i*

**TS10**

|    |             |             |             |
|----|-------------|-------------|-------------|
| Ni | 0.109600000 | 0.051520001 | 0.210390002 |
| Ni | 0.002279997 | 0.167170003 | 0.105319999 |
| Ni | 0.222220004 | 0.277779996 | 0.000000000 |
| Ni | 0.446680009 | 0.052730002 | 0.210199997 |
| Ni | 0.336459994 | 0.169389993 | 0.106859997 |
| Ni | 0.555559993 | 0.277779996 | 0.000000000 |
| Ni | 0.780759990 | 0.055810001 | 0.210189998 |
| Ni | 0.667779982 | 0.165340006 | 0.104829997 |
| Ni | 0.888890028 | 0.277779996 | 0.000000000 |
| Ni | 0.116109997 | 0.391140014 | 0.211750001 |
| Ni | 0.002359986 | 0.499859989 | 0.104680002 |
| Ni | 0.222220004 | 0.611109972 | 0.000000000 |
| Ni | 0.448599994 | 0.386330009 | 0.215859994 |
| Ni | 0.336879998 | 0.499049991 | 0.105230004 |
| Ni | 0.555559993 | 0.611109972 | 0.000000000 |
| Ni | 0.784049988 | 0.385259986 | 0.209030002 |
| Ni | 0.668519974 | 0.500079989 | 0.105700001 |
| Ni | 0.888890028 | 0.611109972 | 0.000000000 |
| Ni | 0.111500002 | 0.722570002 | 0.210010007 |
| Ni | 0.999029994 | 0.832140028 | 0.105870001 |
| Ni | 0.222220004 | 0.944440007 | 0.000000000 |
| Ni | 0.441509992 | 0.724200010 | 0.209779993 |
| Ni | 0.333959997 | 0.833570004 | 0.104039997 |
| Ni | 0.555559993 | 0.944440007 | 0.000000000 |
| Ni | 0.776300013 | 0.717610002 | 0.217850000 |
| Ni | 0.669170022 | 0.831099987 | 0.105980001 |
| Ni | 0.888890028 | 0.944440007 | 0.000000000 |
| H  | 0.350989997 | 0.520919979 | 0.273620009 |
| H  | 0.691470027 | 0.778590024 | 0.337940007 |
| H  | 0.784889996 | 0.591319978 | 0.338580012 |
| C  | 0.677060008 | 0.635710001 | 0.315600008 |
| O  | 0.476630002 | 0.470640004 | 0.315100014 |

Total energy (eV): -157.362722

Imaginary frequency (cm<sup>-1</sup>): 1195*i*

**TS11**

|    |             |             |             |
|----|-------------|-------------|-------------|
| Ni | 0.115440004 | 0.056159999 | 0.208910003 |
| Ni | 0.003219962 | 0.167050004 | 0.104429998 |
| Ni | 0.222220004 | 0.277779996 | 0.000000000 |
| Ni | 0.448729992 | 0.054570001 | 0.210140005 |
| Ni | 0.337579995 | 0.168950006 | 0.105710000 |
| Ni | 0.555559993 | 0.277779996 | 0.000000000 |
| Ni | 0.784979999 | 0.060529999 | 0.210160002 |
| Ni | 0.668240011 | 0.165859997 | 0.104539998 |

|    |             |             |             |
|----|-------------|-------------|-------------|
| Ni | 0.888890028 | 0.277779996 | 0.000000000 |
| Ni | 0.111319996 | 0.387360007 | 0.208869994 |
| Ni | 0.003839970 | 0.500999987 | 0.103780001 |
| Ni | 0.222220004 | 0.611109972 | 0.000000000 |
| Ni | 0.448159993 | 0.386689991 | 0.219640002 |
| Ni | 0.338519990 | 0.499009997 | 0.106370002 |
| Ni | 0.555559993 | 0.611109972 | 0.000000000 |
| Ni | 0.788540006 | 0.388159990 | 0.208159998 |
| Ni | 0.667379975 | 0.499520004 | 0.106210001 |
| Ni | 0.888890028 | 0.611109972 | 0.000000000 |
| Ni | 0.116889998 | 0.722360015 | 0.209490001 |
| Ni | 0.001230001 | 0.832369983 | 0.105729997 |
| Ni | 0.222220004 | 0.944440007 | 0.000000000 |
| Ni | 0.451240003 | 0.725600004 | 0.212770000 |
| Ni | 0.336569995 | 0.833029985 | 0.105329998 |
| Ni | 0.555559993 | 0.944440007 | 0.000000000 |
| Ni | 0.788190007 | 0.728150010 | 0.213510007 |
| Ni | 0.669040024 | 0.832260013 | 0.105230004 |
| Ni | 0.888890028 | 0.944440007 | 0.000000000 |
| H  | 0.723599970 | 0.678160012 | 0.310229987 |
| H  | 0.482470006 | 0.664520025 | 0.326240003 |
| H  | 0.324000001 | 0.302199990 | 0.337060004 |
| C  | 0.567839980 | 0.630270004 | 0.286379993 |
| O  | 0.463349998 | 0.346679986 | 0.319370002 |

Total energy (eV): -157.262695

Imaginary frequency (cm<sup>-1</sup>): 398i

## TS12

|    |             |             |             |
|----|-------------|-------------|-------------|
| Ni | 0.109030001 | 0.048260000 | 0.208460003 |
| Ni | 0.002570000 | 0.165110007 | 0.104160003 |
| Ni | 0.222220004 | 0.277779996 | 0.000000000 |
| Ni | 0.445560008 | 0.047669999 | 0.214900002 |
| Ni | 0.337819993 | 0.166690007 | 0.106059998 |
| Ni | 0.555559993 | 0.277779996 | 0.000000000 |
| Ni | 0.783800006 | 0.048500001 | 0.208360001 |
| Ni | 0.667649984 | 0.164210007 | 0.105740003 |
| Ni | 0.888890028 | 0.277779996 | 0.000000000 |
| Ni | 0.111639999 | 0.384920001 | 0.209059998 |
| Ni | 0.998260021 | 0.496190012 | 0.106459998 |
| Ni | 0.222220004 | 0.611109972 | 0.000000000 |
| Ni | 0.440869987 | 0.390040010 | 0.214739993 |
| Ni | 0.335310012 | 0.497579992 | 0.104249999 |
| Ni | 0.555559993 | 0.611109972 | 0.000000000 |
| Ni | 0.784009993 | 0.384950012 | 0.214660004 |
| Ni | 0.666729987 | 0.495020002 | 0.105460003 |

|    |             |             |             |
|----|-------------|-------------|-------------|
| Ni | 0.888890028 | 0.611109972 | 0.000000000 |
| Ni | 0.112620004 | 0.718930006 | 0.210089996 |
| Ni | 0.002160000 | 0.830449998 | 0.104050003 |
| Ni | 0.222220004 | 0.944440007 | 0.000000000 |
| Ni | 0.446379989 | 0.717580020 | 0.210979998 |
| Ni | 0.336950004 | 0.834280014 | 0.106969997 |
| Ni | 0.555559993 | 0.944440007 | 0.000000000 |
| Ni | 0.784569979 | 0.723010004 | 0.208509997 |
| Ni | 0.666589975 | 0.829209983 | 0.104440004 |
| Ni | 0.888890028 | 0.944440007 | 0.000000000 |
| H  | 0.340009987 | 0.246500000 | 0.345169991 |
| H  | 0.595239997 | 0.478909999 | 0.354149997 |
| H  | 0.439559996 | 0.500630021 | 0.281809986 |
| C  | 0.489980012 | 0.349620014 | 0.320169985 |
| O  | 0.585060000 | 0.246050000 | 0.293260008 |

Total energy (eV): -157.762563

Imaginary frequency (cm<sup>-1</sup>): 938*i*

### TS13

|    |             |             |             |
|----|-------------|-------------|-------------|
| Ni | 0.116810001 | 0.061170001 | 0.210010007 |
| Ni | 0.001330000 | 0.166879997 | 0.104400001 |
| Ni | 0.222220004 | 0.277779996 | 0.000000000 |
| Ni | 0.444599986 | 0.061310001 | 0.210050002 |
| Ni | 0.336829990 | 0.173529997 | 0.106830001 |
| Ni | 0.555559993 | 0.277779996 | 0.000000000 |
| Ni | 0.781589985 | 0.062969998 | 0.208440006 |
| Ni | 0.665719986 | 0.166850001 | 0.104400001 |
| Ni | 0.888890028 | 0.277779996 | 0.000000000 |
| Ni | 0.106619999 | 0.386790007 | 0.209299996 |
| Ni | 0.000880000 | 0.501590014 | 0.104589999 |
| Ni | 0.222220004 | 0.611109972 | 0.000000000 |
| Ni | 0.445179999 | 0.391130000 | 0.233830005 |
| Ni | 0.336369991 | 0.500790000 | 0.106380001 |
| Ni | 0.555559993 | 0.611109972 | 0.000000000 |
| Ni | 0.780229986 | 0.386770010 | 0.209289998 |
| Ni | 0.664460003 | 0.500699997 | 0.106360003 |
| Ni | 0.888890028 | 0.611109972 | 0.000000000 |
| Ni | 0.112300001 | 0.724129975 | 0.209580004 |
| Ni | 0.001870000 | 0.835120022 | 0.105030000 |
| Ni | 0.222220004 | 0.944440007 | 0.000000000 |
| Ni | 0.438919991 | 0.731320024 | 0.210930005 |
| Ni | 0.333559990 | 0.835080028 | 0.105070002 |
| Ni | 0.555559993 | 0.944440007 | 0.000000000 |
| Ni | 0.792850018 | 0.731109977 | 0.210850000 |
| Ni | 0.666790009 | 0.833289981 | 0.103830002 |

|    |             |             |             |
|----|-------------|-------------|-------------|
| Ni | 0.888890028 | 0.944440007 | 0.000000000 |
| H  | 0.566489995 | 0.373629987 | 0.357050002 |
| H  | 0.536029994 | 0.594089985 | 0.379319996 |
| H  | 0.305339992 | 0.351350009 | 0.355830014 |
| C  | 0.473859996 | 0.447409987 | 0.351280004 |
| O  | 0.578859985 | 0.656599998 | 0.272109985 |

Total energy (eV): -157.263054

Imaginary frequency (cm<sup>-1</sup>): 377i

### TS14

|    |             |             |             |
|----|-------------|-------------|-------------|
| Ni | 0.107299998 | 0.048680000 | 0.210120007 |
| Ni | 0.000060000 | 0.164220005 | 0.104900002 |
| Ni | 0.222220004 | 0.277779996 | 0.000000000 |
| Ni | 0.443509996 | 0.048549999 | 0.209690005 |
| Ni | 0.334120005 | 0.166759998 | 0.106660001 |
| Ni | 0.555559993 | 0.277779996 | 0.000000000 |
| Ni | 0.777549982 | 0.052960001 | 0.210219994 |
| Ni | 0.665889978 | 0.164100006 | 0.104800001 |
| Ni | 0.888890028 | 0.277779996 | 0.000000000 |
| Ni | 0.107060000 | 0.384710014 | 0.209639996 |
| Ni | 0.999700010 | 0.497669995 | 0.104690000 |
| Ni | 0.222220004 | 0.611109972 | 0.000000000 |
| Ni | 0.442360014 | 0.379949987 | 0.217490003 |
| Ni | 0.334089994 | 0.496430010 | 0.105999999 |
| Ni | 0.555559993 | 0.611109972 | 0.000000000 |
| Ni | 0.779529989 | 0.384510010 | 0.209399998 |
| Ni | 0.663640022 | 0.496140003 | 0.105959997 |
| Ni | 0.888890028 | 0.611109972 | 0.000000000 |
| Ni | 0.109729998 | 0.718249977 | 0.209830001 |
| Ni | 0.999509990 | 0.830649972 | 0.104750000 |
| Ni | 0.222220004 | 0.944440007 | 0.000000000 |
| Ni | 0.446610004 | 0.721949995 | 0.211019993 |
| Ni | 0.332280010 | 0.830420017 | 0.104640000 |
| Ni | 0.555559993 | 0.944440007 | 0.000000000 |
| Ni | 0.776109993 | 0.721140027 | 0.211030006 |
| Ni | 0.665889978 | 0.830330014 | 0.104769997 |
| Ni | 0.888890028 | 0.944440007 | 0.000000000 |
| H  | 0.575380027 | 0.254000008 | 0.353839993 |
| H  | 0.741729975 | 0.528550029 | 0.358310014 |
| H  | 0.527499974 | 0.402249992 | 0.417789996 |
| H  | 0.559580028 | 0.616739988 | 0.269419998 |
| C  | 0.579540014 | 0.401939988 | 0.363579988 |
| O  | 0.445199996 | 0.429369986 | 0.317149997 |

Total energy (eV): -161.351526

Imaginary frequency (cm<sup>-1</sup>): 934i

**TS15**

|    |             |             |             |
|----|-------------|-------------|-------------|
| Ni | 0.106579997 | 0.052040000 | 0.210649997 |
| Ni | 0.999199986 | 0.166740000 | 0.105240002 |
| Ni | 0.222220004 | 0.277779996 | 0.000000000 |
| Ni | 0.441009998 | 0.051800001 | 0.210940003 |
| Ni | 0.332540005 | 0.167760000 | 0.105850004 |
| Ni | 0.555559993 | 0.277779996 | 0.000000000 |
| Ni | 0.776859999 | 0.058260001 | 0.210370004 |
| Ni | 0.664820015 | 0.166879997 | 0.105290003 |
| Ni | 0.888890028 | 0.277779996 | 0.000000000 |
| Ni | 0.103869997 | 0.386449993 | 0.210460007 |
| Ni | 0.999010026 | 0.500649989 | 0.105130002 |
| Ni | 0.222220004 | 0.611109972 | 0.000000000 |
| Ni | 0.438780010 | 0.381150007 | 0.215379998 |
| Ni | 0.333220005 | 0.500670016 | 0.105149999 |
| Ni | 0.555559993 | 0.611109972 | 0.000000000 |
| Ni | 0.778580010 | 0.386909992 | 0.210460007 |
| Ni | 0.665459991 | 0.501240015 | 0.104910001 |
| Ni | 0.888890028 | 0.611109972 | 0.000000000 |
| Ni | 0.108450003 | 0.721669972 | 0.210529998 |
| Ni | 0.999350011 | 0.834230006 | 0.105430000 |
| Ni | 0.222220004 | 0.944440007 | 0.000000000 |
| Ni | 0.440420002 | 0.720679998 | 0.214699998 |
| Ni | 0.332239985 | 0.834619999 | 0.105509996 |
| Ni | 0.555559993 | 0.944440007 | 0.000000000 |
| Ni | 0.775820017 | 0.722809970 | 0.214890003 |
| Ni | 0.664839983 | 0.832690001 | 0.105169997 |
| Ni | 0.888890028 | 0.944440007 | 0.000000000 |
| H  | 0.561670005 | 0.634559989 | 0.332679987 |
| H  | 0.451629996 | 0.352890015 | 0.291770011 |
| C  | 0.550419986 | 0.605270028 | 0.275849998 |

Total energy (eV): -147.282327

Imaginary frequency (cm<sup>-1</sup>): 754i

**TS16**

|    |             |             |             |
|----|-------------|-------------|-------------|
| Ni | 0.105590001 | 0.053330000 | 0.208719999 |
| Ni | 0.998459995 | 0.167989999 | 0.104170002 |
| Ni | 0.219960004 | 0.278250009 | 0.000000000 |
| Ni | 0.445969999 | 0.052779999 | 0.211649999 |
| Ni | 0.332850009 | 0.168520004 | 0.104889996 |
| Ni | 0.553189993 | 0.278279990 | 0.000000000 |
| Ni | 0.778819978 | 0.053560000 | 0.209270000 |
| Ni | 0.663800001 | 0.167679995 | 0.104369998 |
| Ni | 0.886759996 | 0.278310001 | 0.000000000 |
| Ni | 0.112439997 | 0.389710009 | 0.210280001 |



|    |             |             |             |
|----|-------------|-------------|-------------|
| Ni | 0.997569978 | 0.499929994 | 0.105389997 |
| Ni | 0.219359994 | 0.611060023 | 0.000000000 |
| Ni | 0.444869995 | 0.389560014 | 0.217920005 |
| Ni | 0.332580000 | 0.499370009 | 0.105710000 |
| Ni | 0.553110003 | 0.611479998 | 0.000000000 |
| Ni | 0.783100009 | 0.388429999 | 0.212549999 |
| Ni | 0.663209975 | 0.498959988 | 0.104840003 |
| Ni | 0.886730015 | 0.611500025 | 0.000000000 |
| Ni | 0.111380003 | 0.723730028 | 0.209289998 |
| Ni | 0.998279989 | 0.833540022 | 0.103979997 |
| Ni | 0.219929993 | 0.944639981 | 0.000000000 |
| Ni | 0.443040013 | 0.721729994 | 0.210240006 |
| Ni | 0.331090003 | 0.832650006 | 0.104659997 |
| Ni | 0.553059995 | 0.944530010 | 0.000000000 |
| Ni | 0.779999971 | 0.728070021 | 0.208560005 |
| Ni | 0.663640022 | 0.833260000 | 0.104070000 |
| Ni | 0.886690021 | 0.944850028 | 0.000000000 |
| H  | 0.461279988 | 0.155849993 | 0.323599994 |
| H  | 0.709890008 | 0.370090008 | 0.308880001 |
| H  | 0.424309999 | 0.417409986 | 0.293969989 |
| C  | 0.554080009 | 0.270379990 | 0.282609999 |

Total energy (eV): -150.832000

Imaginary frequency (cm<sup>-1</sup>): 747i

### TS17

|    |             |             |             |
|----|-------------|-------------|-------------|
| Ni | 0.109990001 | 0.050379999 | 0.210309997 |
| Ni | 0.001389980 | 0.166710004 | 0.105370000 |
| Ni | 0.222220004 | 0.277779996 | 0.000000000 |
| Ni | 0.446550012 | 0.047660001 | 0.209900007 |
| Ni | 0.335889995 | 0.169029996 | 0.106930003 |
| Ni | 0.555559993 | 0.277779996 | 0.000000000 |
| Ni | 0.779829979 | 0.053479999 | 0.210510001 |
| Ni | 0.666960001 | 0.166270003 | 0.104879998 |
| Ni | 0.888890028 | 0.277779996 | 0.000000000 |
| Ni | 0.116520002 | 0.386680007 | 0.212290004 |
| Ni | 0.001760006 | 0.498719990 | 0.105430000 |
| Ni | 0.222220004 | 0.611109972 | 0.000000000 |
| Ni | 0.452499986 | 0.380930007 | 0.223289996 |
| Ni | 0.335949987 | 0.497139990 | 0.106859997 |
| Ni | 0.555559993 | 0.611109972 | 0.000000000 |
| Ni | 0.785709977 | 0.386640012 | 0.209950000 |
| Ni | 0.664049983 | 0.497189999 | 0.107079998 |
| Ni | 0.888890028 | 0.611109972 | 0.000000000 |
| Ni | 0.113210000 | 0.719900012 | 0.210669994 |
| Ni | 0.000920000 | 0.832289994 | 0.105120003 |

|    |             |             |             |
|----|-------------|-------------|-------------|
| Ni | 0.222220004 | 0.944440007 | 0.000000000 |
| Ni | 0.446779996 | 0.717750013 | 0.211769998 |
| Ni | 0.334329993 | 0.831510007 | 0.105319999 |
| Ni | 0.555559993 | 0.944440007 | 0.000000000 |
| Ni | 0.782570004 | 0.723140001 | 0.210280001 |
| Ni | 0.666660011 | 0.831889987 | 0.105310000 |
| Ni | 0.888890028 | 0.944440007 | 0.000000000 |
| H  | 0.367359996 | 0.439069986 | 0.284779996 |
| H  | 0.414810002 | 0.176149994 | 0.335180014 |
| H  | 0.656610012 | 0.418170005 | 0.333099991 |
| H  | 0.433059990 | 0.404709995 | 0.371140003 |
| C  | 0.487179995 | 0.344839990 | 0.328390002 |

Total energy (eV): -154.513101

Imaginary frequency (cm<sup>-1</sup>): 1033i

### TS18

|    |             |             |             |
|----|-------------|-------------|-------------|
| Ni | 0.108690001 | 0.053070001 | 0.209879994 |
| Ni | 0.998520017 | 0.164820001 | 0.104850002 |
| Ni | 0.222220004 | 0.277779996 | 0.000000000 |
| Ni | 0.440899998 | 0.049670000 | 0.210439995 |
| Ni | 0.332020015 | 0.165199995 | 0.105789997 |
| Ni | 0.555559993 | 0.277779996 | 0.000000000 |
| Ni | 0.777100027 | 0.060460001 | 0.209800005 |
| Ni | 0.664319992 | 0.166140005 | 0.105109997 |
| Ni | 0.888890028 | 0.277779996 | 0.000000000 |
| Ni | 0.101190001 | 0.384700000 | 0.209759995 |
| Ni | 0.997160017 | 0.499020010 | 0.105099998 |
| Ni | 0.222220004 | 0.611109972 | 0.000000000 |
| Ni | 0.432440013 | 0.376020014 | 0.212960005 |
| Ni | 0.331779987 | 0.498970002 | 0.105250001 |
| Ni | 0.555559993 | 0.611109972 | 0.000000000 |
| Ni | 0.774030030 | 0.387109995 | 0.212200001 |
| Ni | 0.664189994 | 0.499410003 | 0.104730003 |
| Ni | 0.888890028 | 0.611109972 | 0.000000000 |
| Ni | 0.111620001 | 0.720839977 | 0.210350007 |
| Ni | 0.997889996 | 0.831250012 | 0.105810001 |
| Ni | 0.222220004 | 0.944440007 | 0.000000000 |
| Ni | 0.441179991 | 0.719399989 | 0.216340005 |
| Ni | 0.333169997 | 0.830089986 | 0.106590003 |
| Ni | 0.555559993 | 0.944440007 | 0.000000000 |
| Ni | 0.785730004 | 0.729399979 | 0.213339999 |
| Ni | 0.664349973 | 0.831420004 | 0.105410002 |
| Ni | 0.888890028 | 0.944440007 | 0.000000000 |
| H  | 0.654039979 | 0.493570000 | 0.268979996 |
| O  | 0.558860004 | 0.603789985 | 0.278589994 |

Total energy (eV): -141.478954

Imaginary frequency (cm<sup>-1</sup>): 1204*i*

### TS19

|    |             |             |             |
|----|-------------|-------------|-------------|
| Ni | 0.107270002 | 0.056529999 | 0.209999993 |
| Ni | 0.000540018 | 0.169970006 | 0.105090000 |
| Ni | 0.222220004 | 0.277779996 | 0.000000000 |
| Ni | 0.447479993 | 0.060369998 | 0.211590007 |
| Ni | 0.334529996 | 0.171880007 | 0.106289998 |
| Ni | 0.555559993 | 0.277779996 | 0.000000000 |
| Ni | 0.777809978 | 0.059050001 | 0.210710004 |
| Ni | 0.666700006 | 0.170149997 | 0.105190001 |
| Ni | 0.888890028 | 0.277779996 | 0.000000000 |
| Ni | 0.107400000 | 0.393070012 | 0.210480005 |
| Ni | 0.000309944 | 0.503329992 | 0.104960002 |
| Ni | 0.222220004 | 0.611109972 | 0.000000000 |
| Ni | 0.441740006 | 0.396580011 | 0.217549995 |
| Ni | 0.334289998 | 0.501730025 | 0.106679998 |
| Ni | 0.555559993 | 0.611109972 | 0.000000000 |
| Ni | 0.776449978 | 0.390269995 | 0.211710006 |
| Ni | 0.664370000 | 0.501770020 | 0.105990000 |
| Ni | 0.888890028 | 0.611109972 | 0.000000000 |
| Ni | 0.110469997 | 0.726620018 | 0.210309997 |
| Ni | 0.000320000 | 0.836170018 | 0.104759999 |
| Ni | 0.222220004 | 0.944440007 | 0.000000000 |
| Ni | 0.444090009 | 0.729569972 | 0.210290000 |
| Ni | 0.333090007 | 0.836470008 | 0.105120003 |
| Ni | 0.555559993 | 0.944440007 | 0.000000000 |
| Ni | 0.780189991 | 0.729870021 | 0.209549993 |
| Ni | 0.666159987 | 0.835850000 | 0.104929999 |
| Ni | 0.888890028 | 0.944440007 | 0.000000000 |
| H  | 0.562229991 | 0.499350011 | 0.336409986 |
| H  | 0.568509996 | 0.290250003 | 0.270249993 |
| O  | 0.453860015 | 0.367480010 | 0.317360014 |

Total energy (eV): -145.127683

Imaginary frequency (cm<sup>-1</sup>): 932*i*

### TS20

|    |             |             |             |
|----|-------------|-------------|-------------|
| Ni | 0.109010004 | 0.055380002 | 0.210290000 |
| Ni | 0.996029973 | 0.166299999 | 0.106239997 |
| Ni | 0.222220004 | 0.277779996 | 0.000000000 |
| Ni | 0.436260015 | 0.049020000 | 0.210400000 |
| Ni | 0.330440015 | 0.167280003 | 0.105540000 |
| Ni | 0.555559993 | 0.277779996 | 0.000000000 |
| Ni | 0.770690024 | 0.051089998 | 0.210730001 |

|    |             |             |             |
|----|-------------|-------------|-------------|
| Ni | 0.661430001 | 0.163800001 | 0.104379997 |
| Ni | 0.888890028 | 0.277779996 | 0.000000000 |
| Ni | 0.110600002 | 0.386770010 | 0.213110000 |
| Ni | 0.998239994 | 0.498470008 | 0.105140001 |
| Ni | 0.222220004 | 0.611109972 | 0.000000000 |
| Ni | 0.438230008 | 0.384609997 | 0.213349998 |
| Ni | 0.330489993 | 0.497860014 | 0.105839998 |
| Ni | 0.555559993 | 0.611109972 | 0.000000000 |
| Ni | 0.783280015 | 0.374289989 | 0.210319996 |
| Ni | 0.663550019 | 0.498430014 | 0.103510000 |
| Ni | 0.888890028 | 0.611109972 | 0.000000000 |
| Ni | 0.108489998 | 0.722590029 | 0.210329995 |
| Ni | 0.996760011 | 0.832379997 | 0.104400001 |
| Ni | 0.222220004 | 0.944440007 | 0.000000000 |
| Ni | 0.438290000 | 0.725269973 | 0.209189996 |
| Ni | 0.328559995 | 0.831889987 | 0.104840003 |
| Ni | 0.555559993 | 0.944440007 | 0.000000000 |
| Ni | 0.782369971 | 0.739049971 | 0.211040005 |
| Ni | 0.662379980 | 0.830999970 | 0.104379997 |
| Ni | 0.888890028 | 0.944440007 | 0.000000000 |
| C  | 0.382869989 | 0.432390004 | 0.347999990 |
| C  | 0.684099972 | 0.505940020 | 0.254940003 |
| O  | 0.201949999 | 0.410979986 | 0.335260004 |
| O  | 0.529640019 | 0.457390010 | 0.372269988 |

Total energy (eV): -161.422696

Imaginary frequency (cm<sup>-1</sup>): 388i

## TS21

|    |             |             |             |
|----|-------------|-------------|-------------|
| Ni | 0.110579997 | 0.052310001 | 0.209950000 |
| Ni | 0.000420000 | 0.166380003 | 0.105360001 |
| Ni | 0.222220004 | 0.277779996 | 0.000000000 |
| Ni | 0.443500012 | 0.048710000 | 0.209590003 |
| Ni | 0.335060000 | 0.168239996 | 0.106059998 |
| Ni | 0.555559993 | 0.277779996 | 0.000000000 |
| Ni | 0.778569996 | 0.054219998 | 0.210669994 |
| Ni | 0.667469978 | 0.167329997 | 0.105209999 |
| Ni | 0.888890028 | 0.277779996 | 0.000000000 |
| Ni | 0.112230003 | 0.386449993 | 0.211799994 |
| Ni | 0.000320000 | 0.498290002 | 0.105910003 |
| Ni | 0.222220004 | 0.611109972 | 0.000000000 |
| Ni | 0.436120003 | 0.381359994 | 0.219689995 |
| Ni | 0.334829986 | 0.498050004 | 0.106109999 |
| Ni | 0.555559993 | 0.611109972 | 0.000000000 |
| Ni | 0.784309983 | 0.381619990 | 0.214520007 |
| Ni | 0.664799988 | 0.497759998 | 0.105350003 |

|    |             |             |             |
|----|-------------|-------------|-------------|
| Ni | 0.888890028 | 0.611109972 | 0.000000000 |
| Ni | 0.115709998 | 0.722920001 | 0.210339993 |
| Ni | 0.999890029 | 0.832050025 | 0.104910001 |
| Ni | 0.222220004 | 0.944440007 | 0.000000000 |
| Ni | 0.444389999 | 0.725520015 | 0.209710002 |
| Ni | 0.333160013 | 0.831960022 | 0.104670003 |
| Ni | 0.555559993 | 0.944440007 | 0.000000000 |
| Ni | 0.784380019 | 0.732179999 | 0.213569999 |
| Ni | 0.667429984 | 0.831600010 | 0.105149999 |
| Ni | 0.888890028 | 0.944440007 | 0.000000000 |
| O  | 0.395590007 | 0.408690006 | 0.318989992 |
| C  | 0.684390008 | 0.508260012 | 0.264910012 |
| H  | 0.377249986 | 0.284839988 | 0.343010008 |

Total energy (eV): -149.246546

Imaginary frequency (cm<sup>-1</sup>): 232i

### TS22

|    |             |             |             |
|----|-------------|-------------|-------------|
| Ni | 0.107770003 | 0.050900001 | 0.210250005 |
| Ni | 0.001080000 | 0.168850005 | 0.105769999 |
| Ni | 0.222220004 | 0.277779996 | 0.000000000 |
| Ni | 0.444610000 | 0.055550002 | 0.211190000 |
| Ni | 0.333590001 | 0.168050006 | 0.105470002 |
| Ni | 0.555559993 | 0.277779996 | 0.000000000 |
| Ni | 0.777279973 | 0.056070000 | 0.210840002 |
| Ni | 0.666520000 | 0.166820005 | 0.105439998 |
| Ni | 0.888890028 | 0.277779996 | 0.000000000 |
| Ni | 0.101960003 | 0.385780007 | 0.214959994 |
| Ni | 0.999870002 | 0.499920011 | 0.105669998 |
| Ni | 0.222220004 | 0.611109972 | 0.000000000 |
| Ni | 0.449719995 | 0.383619994 | 0.215450004 |
| Ni | 0.333440006 | 0.499969989 | 0.104249999 |
| Ni | 0.555559993 | 0.611109972 | 0.000000000 |
| Ni | 0.777800024 | 0.388740003 | 0.211190000 |
| Ni | 0.665340006 | 0.499790013 | 0.105470002 |
| Ni | 0.888890028 | 0.611109972 | 0.000000000 |
| Ni | 0.108410001 | 0.724940002 | 0.210290000 |
| Ni | 0.999580026 | 0.833779991 | 0.104780003 |
| Ni | 0.222220004 | 0.944440007 | 0.000000000 |
| Ni | 0.447569996 | 0.731400013 | 0.214959994 |
| Ni | 0.333440006 | 0.833500028 | 0.105679996 |
| Ni | 0.555559993 | 0.944440007 | 0.000000000 |
| Ni | 0.782459974 | 0.725579977 | 0.210250005 |
| Ni | 0.664529979 | 0.832289994 | 0.105779998 |
| Ni | 0.888890028 | 0.944440007 | 0.000000000 |
| H  | 0.460790008 | 0.372630000 | 0.293550014 |

|                                                       |             |             |             |
|-------------------------------------------------------|-------------|-------------|-------------|
| C                                                     | 0.332740009 | 0.500609994 | 0.264950007 |
| Total energy (eV): -142.685192                        |             |             |             |
| Imaginary frequency (cm <sup>-1</sup> ): 822 <i>i</i> |             |             |             |
